# Supplementary material for: Systematic comparison and assessment of RNA-seq procedures for gene expression quantitative analysis
Source: PubMed Central journal article supplement (PMC7665074; doi:10.1038/s41598-020-76881-x), 2020-11-12
Supplement: 41598_2020_76881_MOESM1_ESM.pdf [file 41598_2020_76881_MOESM1_ESM.pdf]

# Supplementary note

## Systematic comparison and assessment of RNA-seq procedures for gene expression quantitative analysis

Luis A. Corchete<sup>1-5\*</sup>, Elizabetha A. Rojas<sup>1-3</sup>, Diego Alonso-López<sup>2</sup>, Javier De Las Rivas<sup>2,3</sup>, Norma C. Gutiérrez<sup>1-3,5</sup> and Francisco J. Burguillo<sup>4</sup>

<sup>1</sup> Hematology Department, University Hospital, Salamanca, 37007, Spain.

<sup>2</sup> Cancer Research Institute-IBMCC (USAL-CSIC), Salamanca, 37007, Spain.

<sup>3</sup> Institute of Biomedical Research of Salamanca (IBSAL), Salamanca, 37007, Spain.

<sup>4</sup> Faculty of Pharmacy, University of Salamanca, Salamanca, 37007, Spain.

<sup>5</sup> Center for Biomedical Research in Network of Cancer (CIBERONC), Salamanca, Spain.

\*Correspondence should be addressed to L.A.C. ([lacorsan@usal.es](mailto:lacorsan@usal.es)).

# Supplementary note

## RNA-seq analysis, selected options

### 1. Trimming algorithms

#### A- *Trimmomatic* (v.0.35)

```
-jar trimmomatic-0.35.jar  
PE # Paired-end mode  
-threads 32  
-phred33  
ILLUMINACLIP:TruSeq3-PE.fa:2:30:10:7:true #fasta with paire-end adapter sequences  
: mismatches : palindrome clip threshold : simple clip threshold  
LEADING:3 #Minimum base quality (leading region)  
TRAILING:3 #Minimum base quality (trailing region)  
SLIDINGWINDOW:4:20 #Number of bases in the window : minimum average quality of  
the window  
MINLEN:51 #Minimum read length of read to be kept
```

#### B- *Cutadapt* (v.1.12)

```
cutadapt  
-m 51 #Minimum read length of read to be kept  
-j 32 #Number of cores  
-a file:TruSeq3-PE.fa #Adapter sequences (forward)  
-A file:TruSeq3-PE.fa #Adapter sequences (reverse)  
-q 20 #Quality cutoff to trim end bases from reads  
-e 0.06 #Maximum error rate
```

#### C- *BBDuk* (v.Oct.,23,2015)

```
ref=TruSeq3-PE.fa #Adapter sequences  
ktrim=r #Trim kmers to the right  
k=31 #kmer size  
mink=11 #Look for shorter kmers with lengths from 31 to 11  
hdist=2 #Hamming distance
```

rcomp=t #Look for kmers and their reverse complements  
tbo # trim adapters based on pair overlap detection  
tpe # trim both reads to the same length  
qtrim=rl #Quality trim the right and the left sides  
trimq=20 #Quality cutoff  
minlength=51 #Minimum read length of read to be kept

## 2. Alignment algorithms

### A- *Tophat2* (v.2.1.0),

Tophat2 uses Bowtie2 genome indexes

```
tophat2  
--GTF Homo_sapiens.GRCh37.82.gtf  
--library-type fr-firststrand  
--mate-inner-dist (adjust depending on the sample)  
--read-gap-length 2  
--read-mismatches 2  
--min-anchor-length 8  
--num-threads 32
```

### B- *STAR* (v.2.5.3a)

Indexes were built through the following commands:

```
.STAR  
--runMode genomeGenerate  
--runThreadN 32  
--genomeDir ./star_indexes  
--genomeFastaFiles ./genome.fa #Genome fasta  
--sjdbGTFfile ./Homo_sapiens.GRCh37.82.gtf #Ensembl reference genes  
--sjdbOverhang 100 #Length of the donor/acceptor sequence on each side of the  
junctions
```

STAR options (genome based):

STAR

```
--genomeDir ./star_indexes  
--runThreadN 32  
--readFilesType Fastx  
--readMapNumber -1  
--readStrand Unstranded  
--clip3pNbases 0  
--clip5pNbases 0  
--outFileNamePrefix Sample_STAR  
--outSAMtype BAM Unsorted
```

STAR options (transcriptome based):

STAR

```
--quantMode TranscriptomeSAM  
--readFilesType Fastx  
--readMapNumber -1  
--readStrand Unstranded  
--clip3pNbases 0  
--clip5pNbases 0  
--runThreadN 32  
--outSAMtype BAM Unsorted
```

### C- *Hisat2* (v.2.0.0)

Indexes were built through the following command:

```
hisat2-build  
~/Homo_sapiens/genome.fa #Genome fasta  
~/Homo_sapiens/genome.hisat #Output
```

Hisat2 options:

```
hisat2  
-q #reads are fastq files  
-p 32 #number of cores  
-x ~/Homo_sapiens/genome.hisat  
--rna-strandness RF
```

--known-splicesite-infile ~/Splicesites\_GRCh37.82.txt

#### D- *Bowtie2* (v.2.2.6)

bowtie2

--fr #strand orientation

--minins 0 #The minimum fragment length for valid paired-end alignments

-x ~/Bowtie2Index/genome

-p 32 #Number of cores

#### E- *RUM* (v.2.0.5\_06)

rum\_runner align

--chunks 32 # Number of cores

--index-dir ~/rum\_indexes/hg19

### 3. Counting methods

#### A- *Cufflinks* (v.2.2.1)

cufflinks

-p 32 # Number of cores

--library-type fr-firststrand

-G ~/Homo\_sapiens.GRCh37.82.gtf #Ensembl gene reference

--max-mle-iterations 5000

#### B- *eXpress* (v.1.5.1)

express

--rf-stranded

~/ref/human\_ensembl.transcripts.fa #Transcriptome reference

## C- HTseq (v.0.6.1p1)

### Intersection-strict option:

```
-m HTSeq.scripts.count  
-m intersection-strict # HTseq mode  
-s reverse #Whether the data is from a strand-specific assay  
-r name #Alignment sorted by name  
-a 10 #Minimum alignment quality value  
-i gene_id # Attribute to be used as feature ID  
-f bam # Input format  
Homo_sapiens.GRCh37.82.gtf #Ensembl gene reference
```

### Union option:

```
-m HTSeq.scripts.count  
-m union # HTseq mode  
-s reverse #Whether the data is from a strand-specific assay  
-r name #Alignment sorted by name  
-a 10 #Minimum alignment quality value  
-i gene_id # Attribute to be used as feature ID  
-f bam # Input format  
Homo_sapiens.GRCh37.82.gtf #Ensembl gene reference
```

## D- RSEM (v.1.2.31)

### Preparing Reference Sequences:

```
rsem-prepare-reference  
--gtf Homo_sapiens.GRCh37.82.gtf  
--bowtie2 \  
genome.fa # Genome reference fasta  
ref/human_ensembl # Gene references for Ensembl
```

### Validate BAM:

```
rsem-sam-validator
```

#### Calculating Expression Values Bowtie (from fastq file)

rsem-calculate-expression

--paired-end

--bowtie2

--estimate-rspd

--append-names \

--output-genome-bam

#### Calculating Expression Values (From transcriptome BAM)

rsem-calculate-expression

--bam

--alignments ~/Sample.toTranscriptome.bam

--estimate-rspd

--paired-end

#### E- *Stringtie* (v.1.3.3b)

stringtie

-v # Verbose mode

-p 32 #Number of cores

-G ~/Homo\_sapiens.GRCh37.82.gtf # Gene reference from Ensembl

-f 0.01 #Minimum isoform abundance

## 4. Pseudoalignment algorithms

#### A- *Kallisto* (v.0.43.1)

##### Building an index:

kallisto index

-i TransGRCh37\_82\_Kallisto.idx

/Transcriptome\_REF/TransGRCh37\_82.fa #Transcriptome reference

##### Quantification using bootstrap for Sleuth (Differential expression):

kallisto quant

--fr-stranded

-b 100 #Number of bootstrap samples

## B- *Sailfish* (v.0.9.2)

### Building an index

sailfish index

-t /Transcriptome\_REF/TransGRCh37\_82.fa

-o TransGRCh37\_82\_Sailfish

-k 31 # Minimum match size

### Quantify

sailfish quant

-l ISR #library type: Inward, Stranded, Read 1 comes from the reverse strand

## C- *Salmon* (v.0.8.2)

### Quasi-mapping-based model:

#### Building an index

salmon index

-t /Transcriptome\_REF/TransGRCh37\_82.fa

-i TransGRCh37\_82\_SalmonQuasi

--type quasi

-k 31 # Minimum match size

#### Quantify

salmon quant \

-i TransGRCh37\_82\_SalmonQuasi

-l ISR #library type: Inward, Stranded, Read 1 comes from the reverse strand

### Lightweight-alignment (FMD-based) mode

#### Building an index

index -t /Transcriptome\_REF/TransGRCh37\_82.fa -i  
TransGRCh37\_82\_SalmonFMD --type fmd

#### Quantify

salmon quant



```
-i TransGRCh37_82_SalmonFMD
```

```
-l ISR #library type: Inward, Stranded, Read 1 comes from the reverse strand
```

## 5. Differential expression methods (R and Linux Scripts)

### A- baySeq (v.2.10.0) (R)

```
library(baySeq)

##Define null cluster
if(require("parallel")) cl <- makeCluster(8) else cl <- NULL

##Load data
tabla <- read.table("Expression_Data.txt",sep="\t",header=T,row.names=1)
tabla <- as.matrix(tabla)

##3 samples in 2 groups
replicates <- c("Group1","Group1","Group1","Group2","Group2","Group2")
groups <- list(NDE=c(1,1,1,1,1,1),DE=c(1,1,1,2,2,2))

##Combine count data and models
CD <- new("countData",data=tabla,replicates=replicates,groups=groups)

##Inferre library size from data
libsizes(CD) <-getLibsizes(CD)

##Negative Binomial Approach

##Estimate parameters
#####quasi-likelihood estimation of priors#####
CD1 <- getPriors.NB(CD,samplesize=10000,estimation="QL",cl=cl)

##Estimate proportions of DE counts
CD1 <- getLikelihoods(CD1,cl=cl,bootStraps=3,verbose=FALSE)

options("max.print"=1E9)
options("width"=10000)
sink("DE_baySeq_QL.txt")
print(topCounts(CD1,group="DE",FDR=1))
sink()
sink("NDE_baySeq_QL.txt")
```

```
print(topCounts(CD1,group="NDE",FDR=1))
sink()
```

## B- Cuffdiff (v.2.2.1) (linux)

```
##Assemble transcripts for each sample

cufflinks -p 12 --library-type fr-firststrand -G Homo_sapiens.GRCh37.82.gtf -o Sample_cufflinks
/Sample.bam

##Create a file called assemblies.txt:

./Sample_1/transcripts.gtf
./Sample_2/transcripts.gtf
./Sample_N/transcripts.gtf

##Run cuffmerge to create a single transcriptome annotation

cuffmerge -g Homo_sapiens.GRCh37.82.gtf -s genome.fa -p 32 assemblies.txt

##CuffQuant

cuffquant -g /media/luis/Seagate_8Tb_1/3_Tesis_RNAseq/Homo_sapiens.GRCh37.82.gtf -b
genome.fa -p 12 --library-type fr-firststrand 141048.bam

##Differentially expressed genes and transcripts

cuffdiff -o Cuffdiff_out -b genome.fa -p 32 -L Treatment,Control --library-type fr-firststrand -b
genome.fa -u merged_asm/merged.gtf \
Treatment_1.cxb,Treatment_2.cxb,Treatment_N.cxb \
Control_1.cxb,Control_2.cxb,Control_N.cxb
```

## C- DESeq2 (v.1.16.1) (R)

```
library(DESeq2)

##Load a matrix with the counts

sampleTable <- read.table("Expression_Data.txt",header=T,sep="\t",row.names=1)

##Load a phenotype matrix with the sample names in the first column and without headings

## in the second column put the sample group under the heading "condition"

sampleCondition <- read.table("Phenotype.txt",header=T,sep="\t",row.names=1)

##Create the DESeq object

dds <-
DESeqDataSetFromMatrix(countData=sampleTable,colData=sampleCondition,design=~condition
)
```

```

##Establish the factor order in the analysis
dds$condition <- factor(dds$condition,levels=c("Group1","Group2"))

##Launch the differential expression analysis
dds <- DESeq(dds)
res <- results(dds)

res

##Save the results
write.csv(as.data.frame(res),file="Results_DESeq2.csv")

##Order the results by the adjusted p-value
resOrdered <- res[order(res$padj),]

##summary of the results
summary(res)

##count significant genes at padj<=0.05
sum(res$padj<=0.05,na.rm=T)

##Decrease the alpha value (default = 0.1)
res05 <- results(dds,alpha=0.05)
sum(res05$padj<=0.05,na.rm=T)

##MAplot
plotMA(res,main="DESeq2",ylim=c(-2,2))

##Obtain the unshrunk log2 fold Changes and lfcMLE
resMLE <- results(dds,addMLE=T)
head(resMLE,4)
plotMA(resMLE,MLE=TRUE,main="unshrunk LFC",ylim=c(-2,2))

##Gene count graphs
plotCounts(dds,gene=which.min(res$padj),intgroup="condition")

```

## D- EBseq (v.1.16.0) (R)

```

library(EBSeq)
tabla <- read.table("Expression_Data.txt",sep="\t",header=T,row.names=1)
tabla <- as.matrix(tabla)
Sizes=MedianNorm(tabla)

EBOut=EBTest(Data=tabla,Conditions=as.factor(rep(c("Group1","Group2"),each=3)),sizeFactors
=Sizes, maxround=5)

```

```

EBDERes=GetDEResults(EBOut, FDR=1,Threshold_FC=1,Threshold_FCRatio=0)
##Calculate FC
FC <- PostFC(EBOut, SmallNum = 0.01)
##Obtain probabilities
Expression <- cbind(EBDERes$PPMat,EBDERes$Status,FC$PostFC,FC$RealFC)
options("max.print"=1E9)
options("width"=10000)
sink("EBSeq_Results.txt")
print(Expression)
sink()

```

### *E- edgeR (v.3.18.1) (R)*

```

tabla <- read.table("Expression_Data.txt",header=T,sep="\t",row.names=1)
library(edgeR)
##Create list and calculate library sizes
group <- c(1,1,1,2,2,2)
d <- DGEList(counts=tabla,group=factor(group))
d
##Normalization
dt <- calcNormFactors(d,method="TMM")
##Estimate dispersion
d1 <- estimateCommonDisp(dt, verbose=T)
d1 <- estimateTagwiseDisp(d1)

design.mat <- model.matrix(~ 0 + dt$samples$group)
colnames(design.mat) <- levels(dt$samples$group)
d2 <- estimateGLMCommonDisp(dt,design.mat)
d2 <- estimateGLMTrendedDisp(d2,design.mat, method="auto")
# You can change method to "auto", "bin.spline", "power", "spline", "bin.loess".
# The default is "auto" which chooses "bin.spline" when > 200 tags and "power" otherwise.
d2 <- estimateGLMTagwiseDisp(d2,design.mat)

##Compare groups (exact test)
et12 <- exactTest(d1, pair=c(1,2))
options("max.print"=1E9)

```

```

options("width"=10000)
sink("edgeR_ExactTest_TMM.txt")
print(topTags(et12, n=length(tabla[,1]), adjust.method="BH", sort.by="PValue", p.value=1))
sink()

##Compare groups GLM Log Likelihood Ratio
fit <- glmFit(d2,design.mat)
lrt12 <- glmLRT(fit,contrast=c(-1,1))
sink("edgeR_GLM_TMM.txt")
print(topTags(lrt12, n=length(tabla[,1]), adjust.method="BH", sort.by="PValue", p.value=1))
sink()

```

## *F- Ballgown (v.2.8.4) (linux and R)*

```

#1# Estimate transcript abundances and create table counts for Ballgown (1 for each sample)
stringtie -e -B -p 32 -G Homo_sapiens.GRCh37.82.gtf -o ./Sample.gtf Sample.bam

```

```

#2# Run Ballgown in R

```

```

library(ballgown)

```

```

library(RSkittleBrewer)

```

```

library(geneFilter)

```

```

library(dplyr)

```

```

library(devtools)

```

```

#Load the phenotype data for the samples

```

```

pheno_data = read.csv("Phenotype.csv")

```

```

##Format:ids Treatment cov2

```

```

#Read in the expression data that were calculated by StringTie or Cufflinks

```

```

bg = ballgown(dataDir = "Ballgown", samplePattern = "Sample", pData=pheno_data)

```

```

#Filter to remove low-abundance genes. One common issue with RNA-seq data is that genes
often have very few or zero counts

```

```

bg_filt = subset(bg,"rowSums(gexpr(bg) >=4) >=1",genomesubset=TRUE)

```

```

#Identify genes that show statistically significant differences between groups

```

```
results_genes_F = stattest(bg_filt, feature="gene", covariate="Treatment", getFC=TRUE,
meas="FPKM")
```

```
#Write the results to a csv file that can be shared and distributed:
```

```
write.csv(results_genes_F, "Ballgown_FPKM_results_gexpr.csv",row.names=FALSE)
```

```
##Add HUGO gene symbol
```

```
indices <- match(results_genes_F$id, texpr(bg, 'all')$gene_id)
```

```
gene_names_for_result <- texpr(bg, 'all')$gene_name[indices]
```

```
results_genes_F <- data.frame(geneNames=gene_names_for_result, results_genes_F)
```

```
write.csv(results_genes_F, "Ballgown_FPKM_results.csv",row.names=FALSE)
```

## G- limma (v.3.32.10) (R)

```
library(limma)
```

```
library(edgeR)
```

```
tabla <- read.table("Expression_Data.txt",sep="\t",header=T,row.names=1)
```

```
dge <- DGEList(counts=tabla)
```

```
##design
```

```
targets<-readTargets("Targets.txt")
```

```
Treat<-factor(targets$Treatment,levels=c("Group1","Group2"))
```

```
design<-model.matrix(~Treat)
```

```
##Normalizing
```

```
dge <- calcNormFactors(dge)
```

```
##Differential expression: Limma trend
```

```
#convert counts to logCPM
```

```
logCPM <- cpm(dge,log=TRUE,priort.count=3)
```

```
##Fit the model
```

```
fit <- lmFit(logCPM,design)
```

```
fit <- eBayes(fit,trend=TRUE)
```

```
options("max.print"=1E9)
```

```
options("width"=10000)
```

```
sink("limma-Trend_Results.txt")
```

```
print(topTable(fit,coef=ncol(design),p.value=1, number= length(tabla[,1])))
```

```
sink()
```

```
##Voom method
```

```

v <- voom(dge,design,plot=T)
fitv <- lmFit(v,design)
fitv <- eBayes(fitv)
sink("limma-VOOM_Results.txt")
print(topTable(fitv,coef=ncol(design),p.value=1, number= length(tabla[,1])))
sink()

```

## *H- NOIseq (v.2.20.0) (R)*

```

library(NOISeq)
tabla <- read.table("b_BM-DMvJJ-DM_1.4.2.1_Filt.txt",sep="\t",header=T,row.names=1)
myfactors = data.frame(Condition = c(rep("JJ", 3), rep("BM",3)))
mydata <- readData(data = tabla, factors = myfactors)

##Differential expression
##Available normalization methods: norm = "rpkm", "uqua", "tmm2", "none"
mynoiseqbio = noisseqbio(mydata, k = 0.5, norm = "rpkm", nclust = 15, plot = FALSE,
factor="Condition", lc = 0, r = 50, adj = 1.5,
a0per = 0.9, random.seed = 12345, filter = 0, depth = NULL,
cv.cutoff = NULL, cpm = NULL)

options("max.print"=1E9)
options("width"=10000)
sink("NOISeq-RPKM_Results.txt")
print(mynoiseqbio@results[[1]])
sink()

##k=Counts equal to 0 are replaced by k. By default, k = 0.5
##norm = Normalization method. It can be one of "rpkm" (default), "uqua" (upper quartile),"tmm"
(trimmed mean of M) or "n" (no normalization).
##r Number of permutations to generate noise distribution by resampling.
## adj Smoothing parameter for the Kernel Density Estimation of noise distribution. Higher values
produce smoother curves.

```

##nclust Number of clusters for the K-means algorithm. Used when the number of replicates per condition is less than 5.

##a0per M and D values are corrected for the biological variability by being divided by  $S + a_0$ , where S is the standard error of the corresponding statistic and  $a_0$  is determined by the value of a0per parameter. If a0per is NULL,  $a_0 = 0$ . If a0per is a value between 0 and 1,  $a_0$  is the a0per percentile of S values for all features. If a0per = "B",  $a_0$  takes the highest value given by  $100 * \max(S)$ .

##filter If filter=0, no filtering is performed

### I- SAMseq (available in the samr R package, v.2.0).

```
library(samr)
tabla <- read.table("Expression_Data.txt", header=T, sep="\t", row.names=1)
##Group1 Samples (control)
n1 <- 3
##Group2 (treatment)
n2 <- 3
tabla.cls <- rep(c(1,2),c(n1,n2))
sam.out <- SAMseq(tabla,tabla.cls,resp.type="Two class
unpaired",nperms=1000,random.seed=123456,genenames=rownames(tabla),fdr.output =1)
options("max.print"=1E9)
options("width"=10000)
sink("SAMseq_Results.txt")
print(sam.out$siggenes.table)
sink()
```
