# Supplementary material for: Systematic comparison and assessment of RNA-seq procedures for gene expression quantitative analysis
Source: PubMed Central journal article supplement (PMC7665074; doi:10.1038/s41598-020-76881-x), 2020-11-12
Supplement: 41598_2020_76881_MOESM2_ESM.pdf [file 41598_2020_76881_MOESM2_ESM.pdf]

# Supplementary Figures and Tables

## Systematic comparison and assessment of RNA-seq procedures for gene expression quantitative analysis

Luis A. Corchete<sup>1-5\*</sup>, Elizabetha A. Rojas<sup>1-3</sup>, Diego Alonso-López<sup>2</sup>, Javier De Las Rivas<sup>2,3</sup>, Norma C. Gutiérrez<sup>1-3,5</sup> and Francisco J. Burguillo<sup>4</sup>

<sup>1</sup> Hematology Department, University Hospital, Salamanca, 37007, Spain.

<sup>2</sup> Cancer Research Institute-IBMCC (USAL-CSIC), Salamanca, 37007, Spain.

<sup>3</sup> Institute of Biomedical Research of Salamanca (IBSAL), Salamanca, 37007, Spain.

<sup>4</sup> Faculty of Pharmacy, University of Salamanca, Salamanca, 37007, Spain.

<sup>5</sup> Center for Biomedical Research in Network of Cancer (CIBERONC), Salamanca, Spain.

\*Correspondence should be addressed to L.A.C. ([lacorsan@usal.es](mailto:lacorsan@usal.es)).

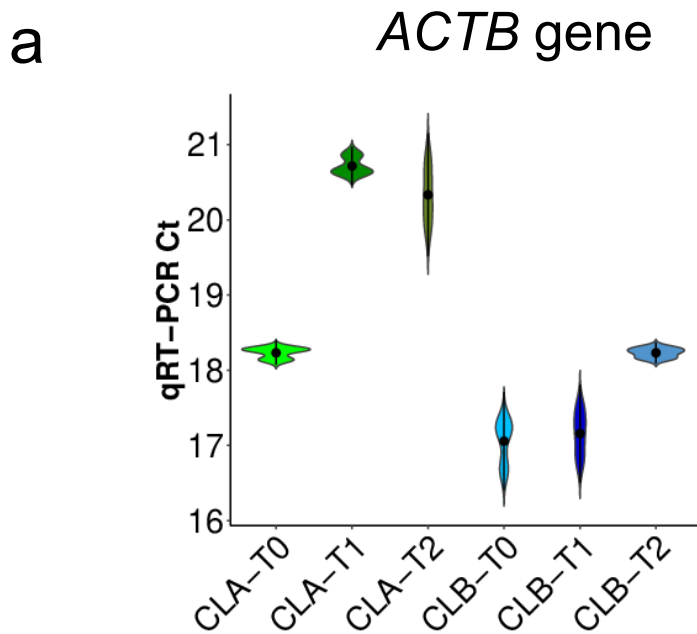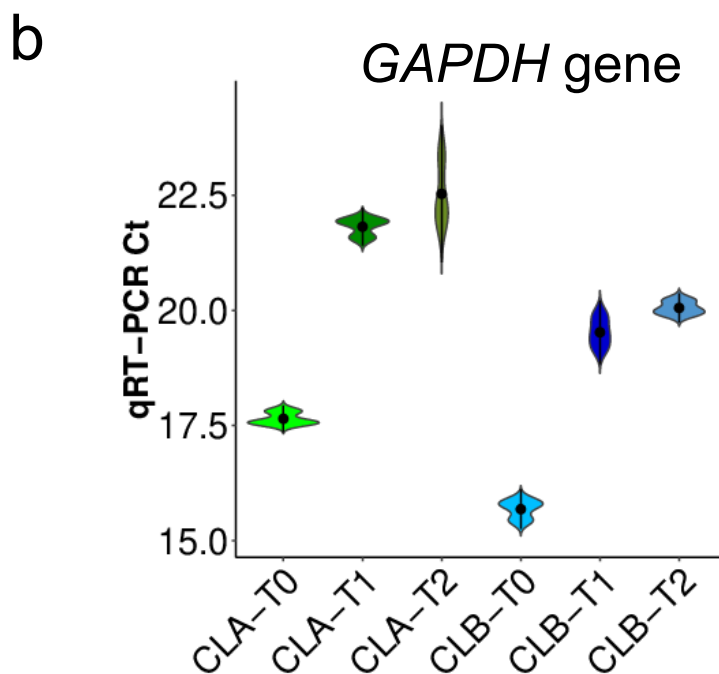

**Supplementary Figure S1.** qRT-PCR Ct values of the *GAPDH* and *ACTB* genes across all assayed conditions. Violin plots of (a) *ACTB* and (b) *GAPDH* genes using the Ct values from the qRT-PCR assay considering the KMS12-BM (CLA) and JJN-3 (CLB) cell lines, treated with Amiloride (T1) or TG003 (T2) and controls (T0).

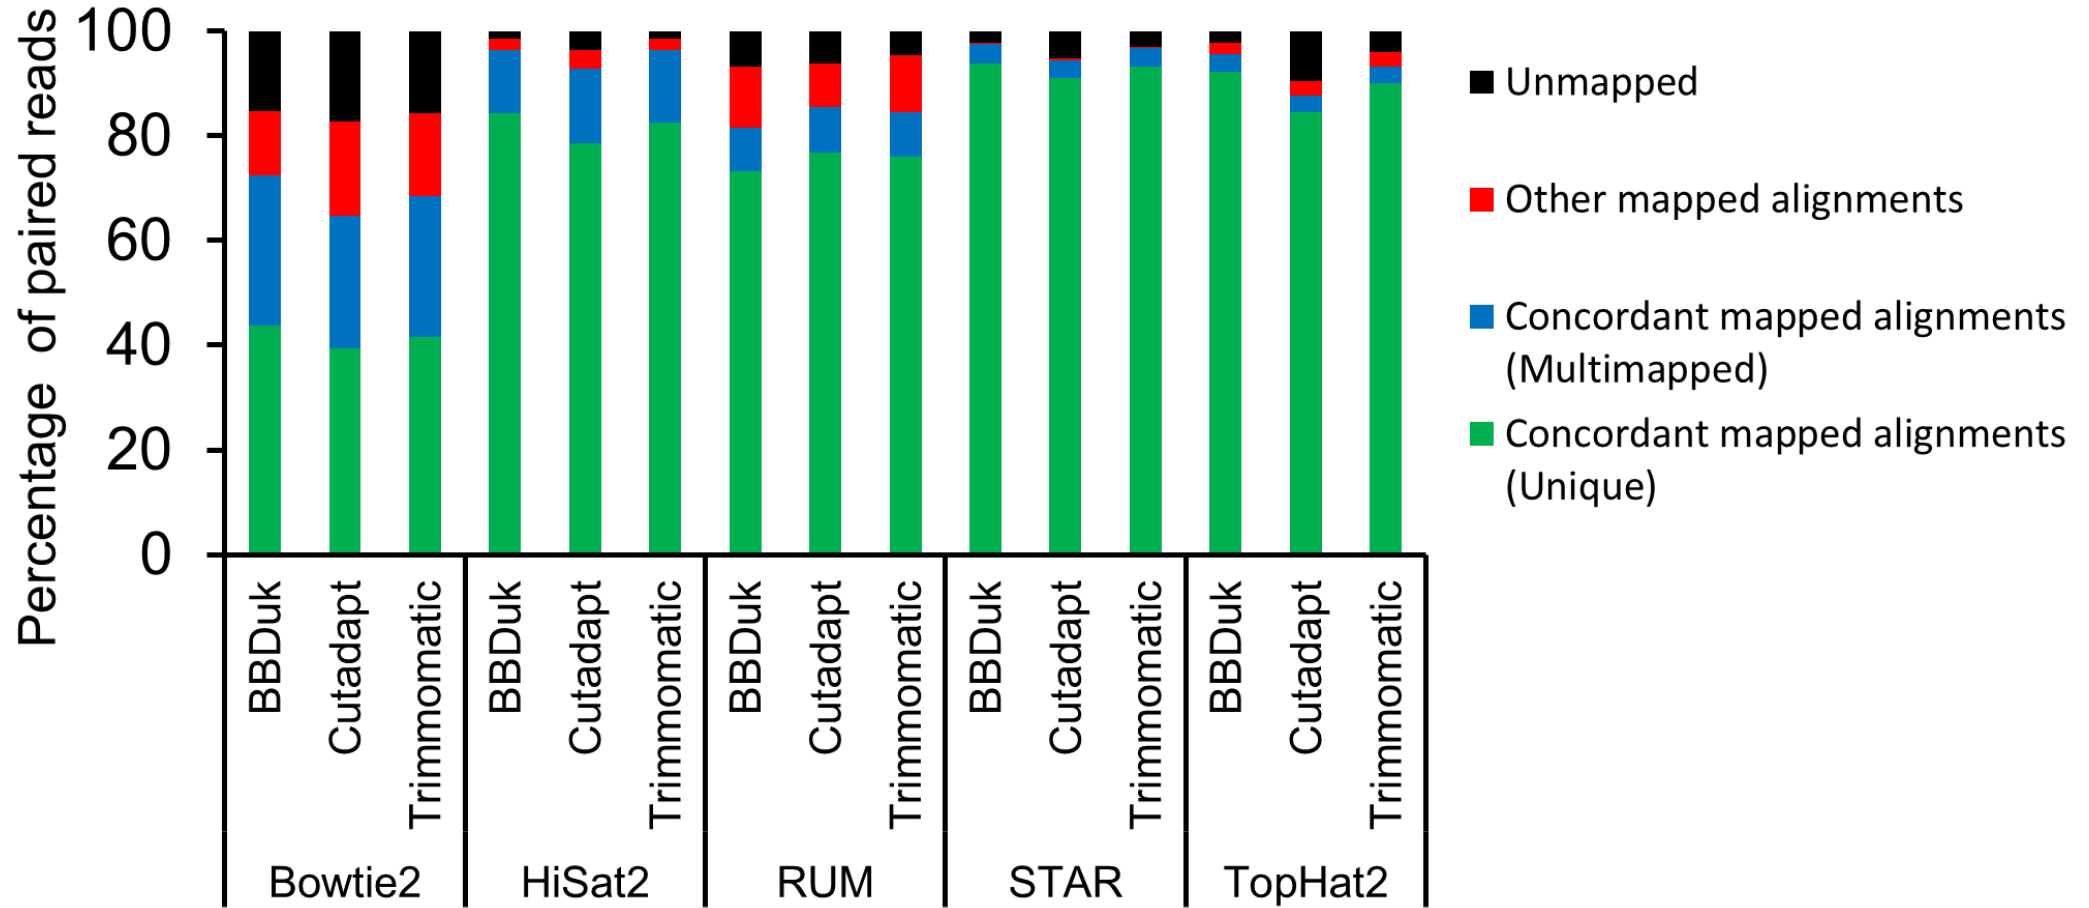

**Supplementary Figure S2.** Mapping summary of the alignment algorithms. The output of the five alignment methods was analysed considering the previous trimming algorithms (*BBDuk*, *Cutadapt* or *Trimmomatic*). The number of alignments are shown as percentages and are classified into four categories according the alignment type: unmapped alignments, concordant multimapped alignments, concordant uniquely mapped alignments and other alignments.

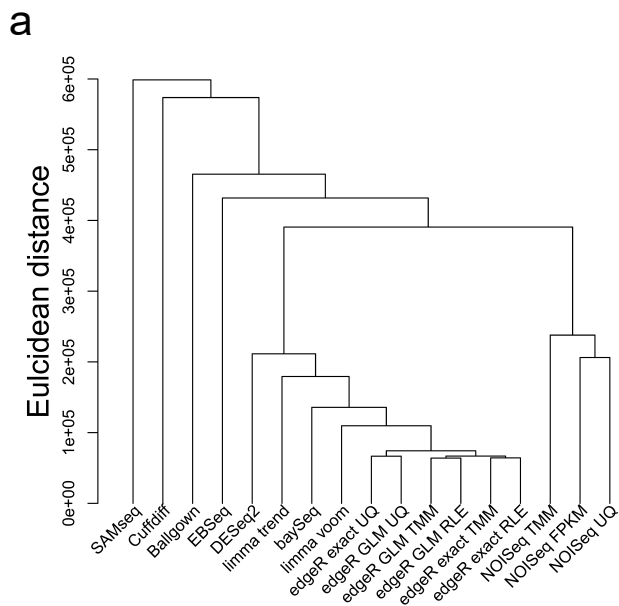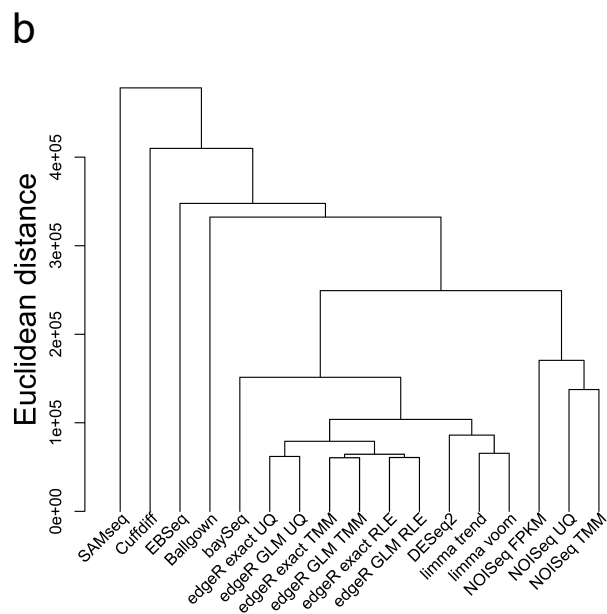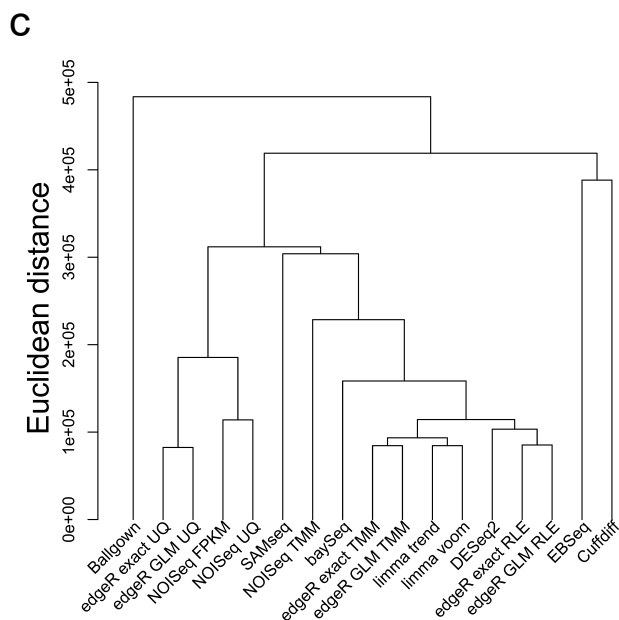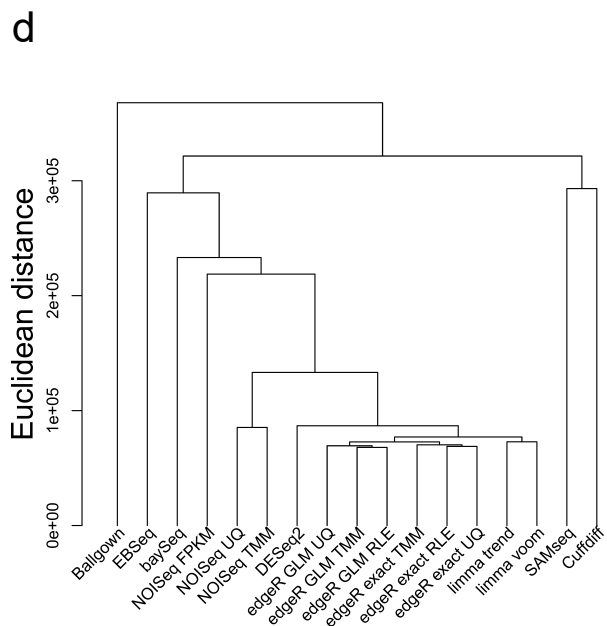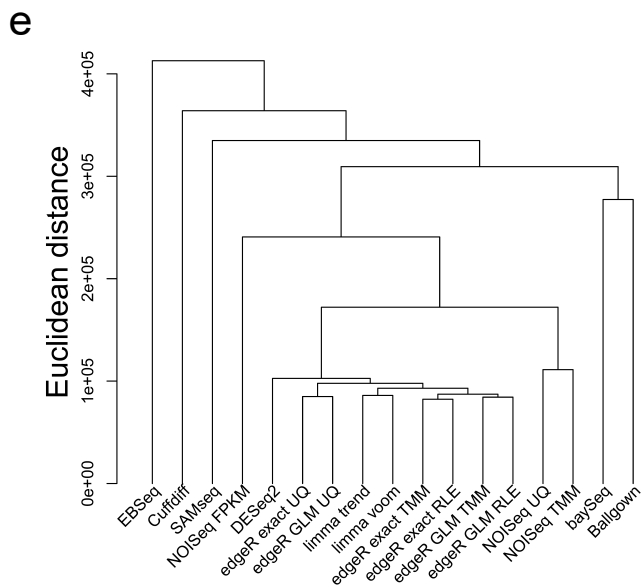

**Supplementary Figure S3.** Similarity among the 17 RNA-seq differential gene expression detection methods. Each graph represents the Euclidean distance among the 17 methods using dendrograms. **(a)** CLA-T0 vs. CLB-T0, **(b)** CLA-T1 vs. CLA-T0, **(c)** CLA-T2 vs. CLA-T0, **(d)** CLB-T1 vs. CLB-T0 and **(e)** CLB-T2 vs. CLB-T0. CLA = cell line A (KMS12MB); CLB = cell line B (JJN-3); T0 = DMSO; T1 = Amiloride; T2 = TG003

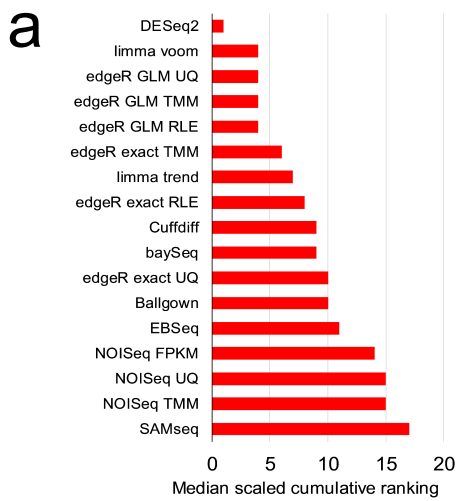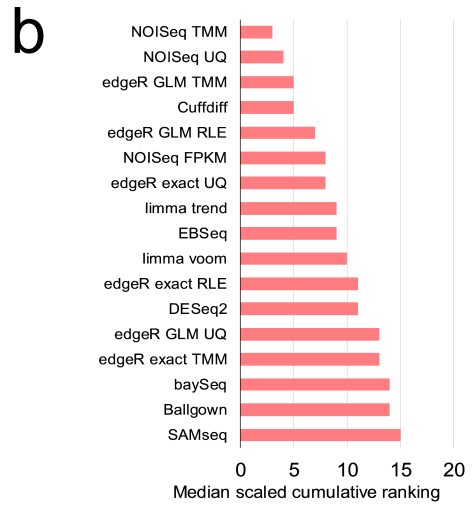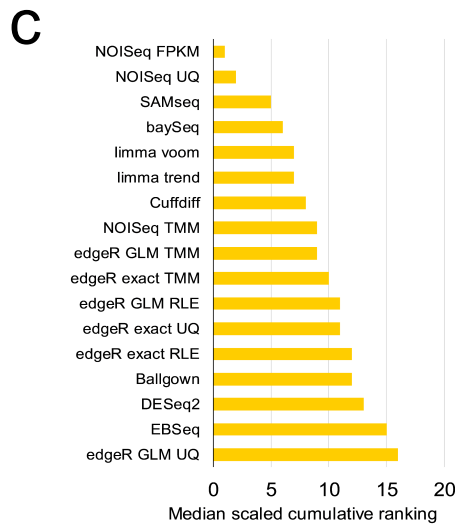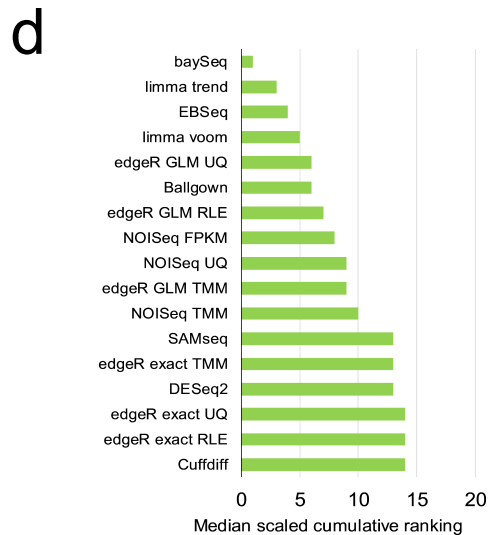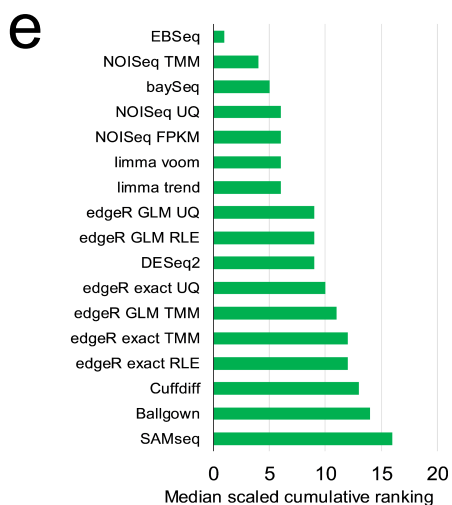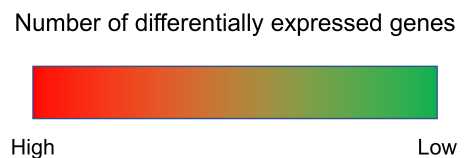

**Supplementary Figure S4.** Performance of the 17 differential expression methods based on the five contrasts proposed in this work. These five contrasts are defined according to the number of changes in gene expression between the contrasted conditions. **(a)** CLA-T0 vs. CLB-T0, **(b)** CLA-T1 vs. CLA-T0, **(c)** CLA-T2 vs. CLA-T0, **(d)** CLB-T1 vs. CLB-T0 and **(e)** CLB-T2 vs. CLB-T0, where CLA is the KMS12-BM cell line, CLB is the JJN-3 cell line, T0 is DMSO treatment, T1 is Amiloride treatment and T2 is TG003 treatment.

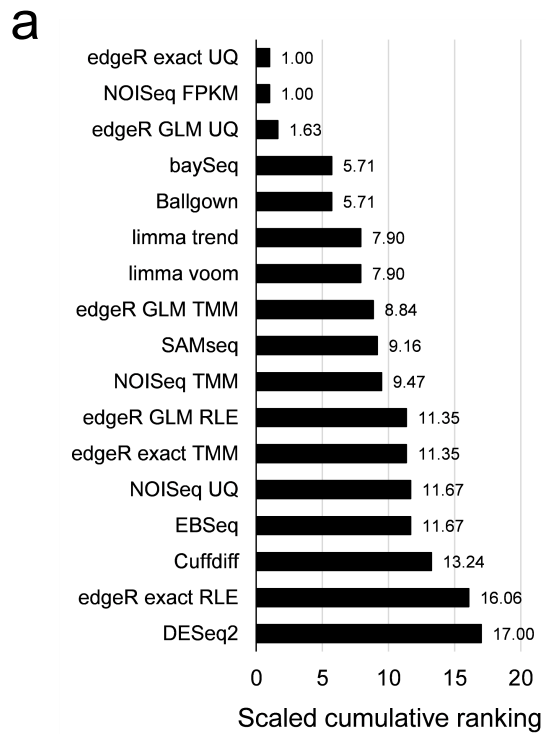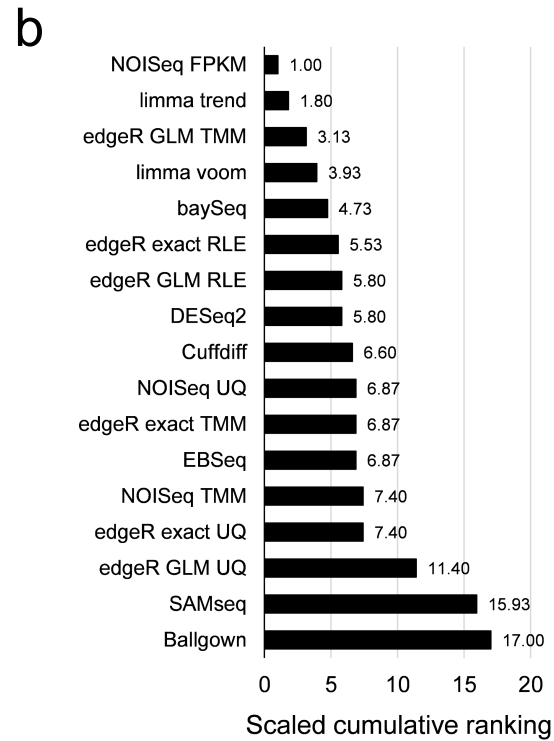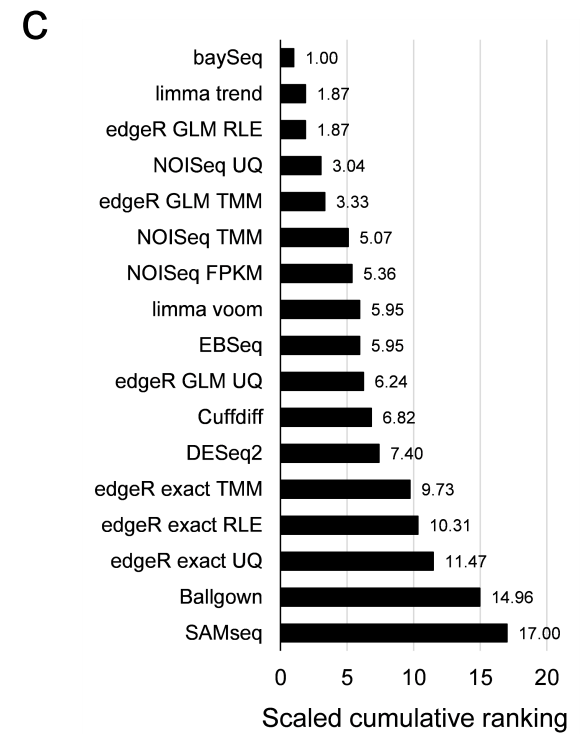

**Supplementary Figure S5.** Performance of the 17 differential expression methods based on the three FDR cutoffs proposed in this work. (a) FDR < 0.05, (b) FDR < 0.01 and (c) FDR < 0.001.

|                 | CLA-T0<br>vs.<br>CLB-T0 |            |             | CLA-T1<br>vs.<br>CLA-T0 |            |             | CLA-T2<br>vs.<br>CLA-T0 |            |             | CLB-T1<br>vs.<br>CLB-T0 |            |             | CLB-T2<br>vs.<br>CLB-T0 |            |             | Overall<br>median |
|-----------------|-------------------------|------------|-------------|-------------------------|------------|-------------|-------------------------|------------|-------------|-------------------------|------------|-------------|-------------------------|------------|-------------|-------------------|
|                 | FDR < 0.05              | FDR < 0.01 | FDR < 0.001 | FDR < 0.05              | FDR < 0.01 | FDR < 0.001 | FDR < 0.05              | FDR < 0.01 | FDR < 0.001 | FDR < 0.05              | FDR < 0.01 | FDR < 0.001 | FDR < 0.05              | FDR < 0.01 | FDR < 0.001 |                   |
| Ballgown        | 12                      | 10         | 8           | 17                      | 7          | 14          | 12                      | 16         | 6           | 6                       | 5          | 11          | 5                       | 14         | 16          | 11                |
| baySeq          | 12                      | 9          | 7           | 14                      | 14         | 2           | 12                      | 6          | 3           | 3                       | 1          | 1           | 7                       | 4          | 5           | 6                 |
| Cuffdiff        | 9                       | 11         | 9           | 10                      | 5          | 1           | 8                       | 13         | 5           | 17                      | 14         | 5           | 17                      | 5          | 13          | 9                 |
| DESeq2          | 1                       | 1          | 11          | 3                       | 11         | 11          | 17                      | 13         | 11          | 13                      | 12         | 14          | 9                       | 13         | 6           | 11                |
| EBSeq           | 11                      | 6          | 13          | 11                      | 6          | 9           | 15                      | 15         | 17          | 7                       | 2          | 4           | 1                       | 1          | 1           | 7                 |
| edgeR exact RLE | 8                       | 1          | 11          | 3                       | 11         | 11          | 16                      | 12         | 7           | 15                      | 9          | 14          | 12                      | 12         | 14          | 11                |
| edgeR exact TMM | 1                       | 14         | 6           | 6                       | 13         | 15          | 10                      | 8          | 12          | 13                      | 9          | 14          | 12                      | 10         | 15          | 12                |
| edgeR exact UQ  | 3                       | 13         | 10          | 1                       | 8          | 17          | 2                       | 11         | 14          | 16                      | 11         | 14          | 3                       | 10         | 10          | 10                |
| edgeR GLM RLE   | 15                      | 3          | 4           | 6                       | 16         | 7           | 11                      | 3          | 13          | 9                       | 7          | 7           | 16                      | 7          | 9           | 7                 |
| edgeR GLM TMM   | 4                       | 3          | 5           | 5                       | 2          | 6           | 9                       | 10         | 9           | 9                       | 7          | 12          | 14                      | 7          | 11          | 7                 |
| edgeR GLM UQ    | 4                       | 5          | 3           | 8                       | 17         | 13          | 2                       | 16         | 16          | 8                       | 6          | 2           | 4                       | 9          | 11          | 8                 |
| limma trend     | 7                       | 7          | 1           | 11                      | 9          | 4           | 6                       | 7          | 15          | 11                      | 3          | 3           | 14                      | 3          | 6           | 7                 |
| limma voom      | 4                       | 12         | 2           | 11                      | 9          | 10          | 6                       | 8          | 7           | 12                      | 3          | 5           | 11                      | 2          | 6           | 7                 |
| NOISeq FPKM     | 17                      | 8          | 14          | 8                       | 1          | 8           | 1                       | 1          | 1           | 5                       | 13         | 8           | 10                      | 6          | 2           | 8                 |
| NOISeq TMM      | 10                      | 15         | 15          | 2                       | 3          | 5           | 12                      | 4          | 9           | 2                       | 16         | 10          | 2                       | 15         | 4           | 9                 |
| NOISeq UQ       | 14                      | 15         | 16          | 16                      | 4          | 2           | 4                       | 2          | 2           | 4                       | 17         | 9           | 6                       | 16         | 2           | 6                 |
| SAMseq          | 16                      | 17         | 17          | 15                      | 14         | 16          | 5                       | 5          | 4           | 1                       | 15         | 13          | 8                       | 17         | 16          | 15                |

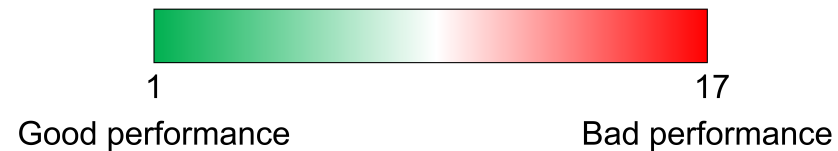

**Supplementary Figure S6.** Overall performance of the 17 differential expression methods based on the combination of the five contrasts and the three FDR cutoffs proposed in this work. CLA is the KMS12-BM cell line, CLB is the JJN-3 cell line, T0 is DMSO treatment, T1 is Amiloride treatment and T2 is TG003 treatment.

# edgeR exact test

# edgeR GLM

# NOIseq

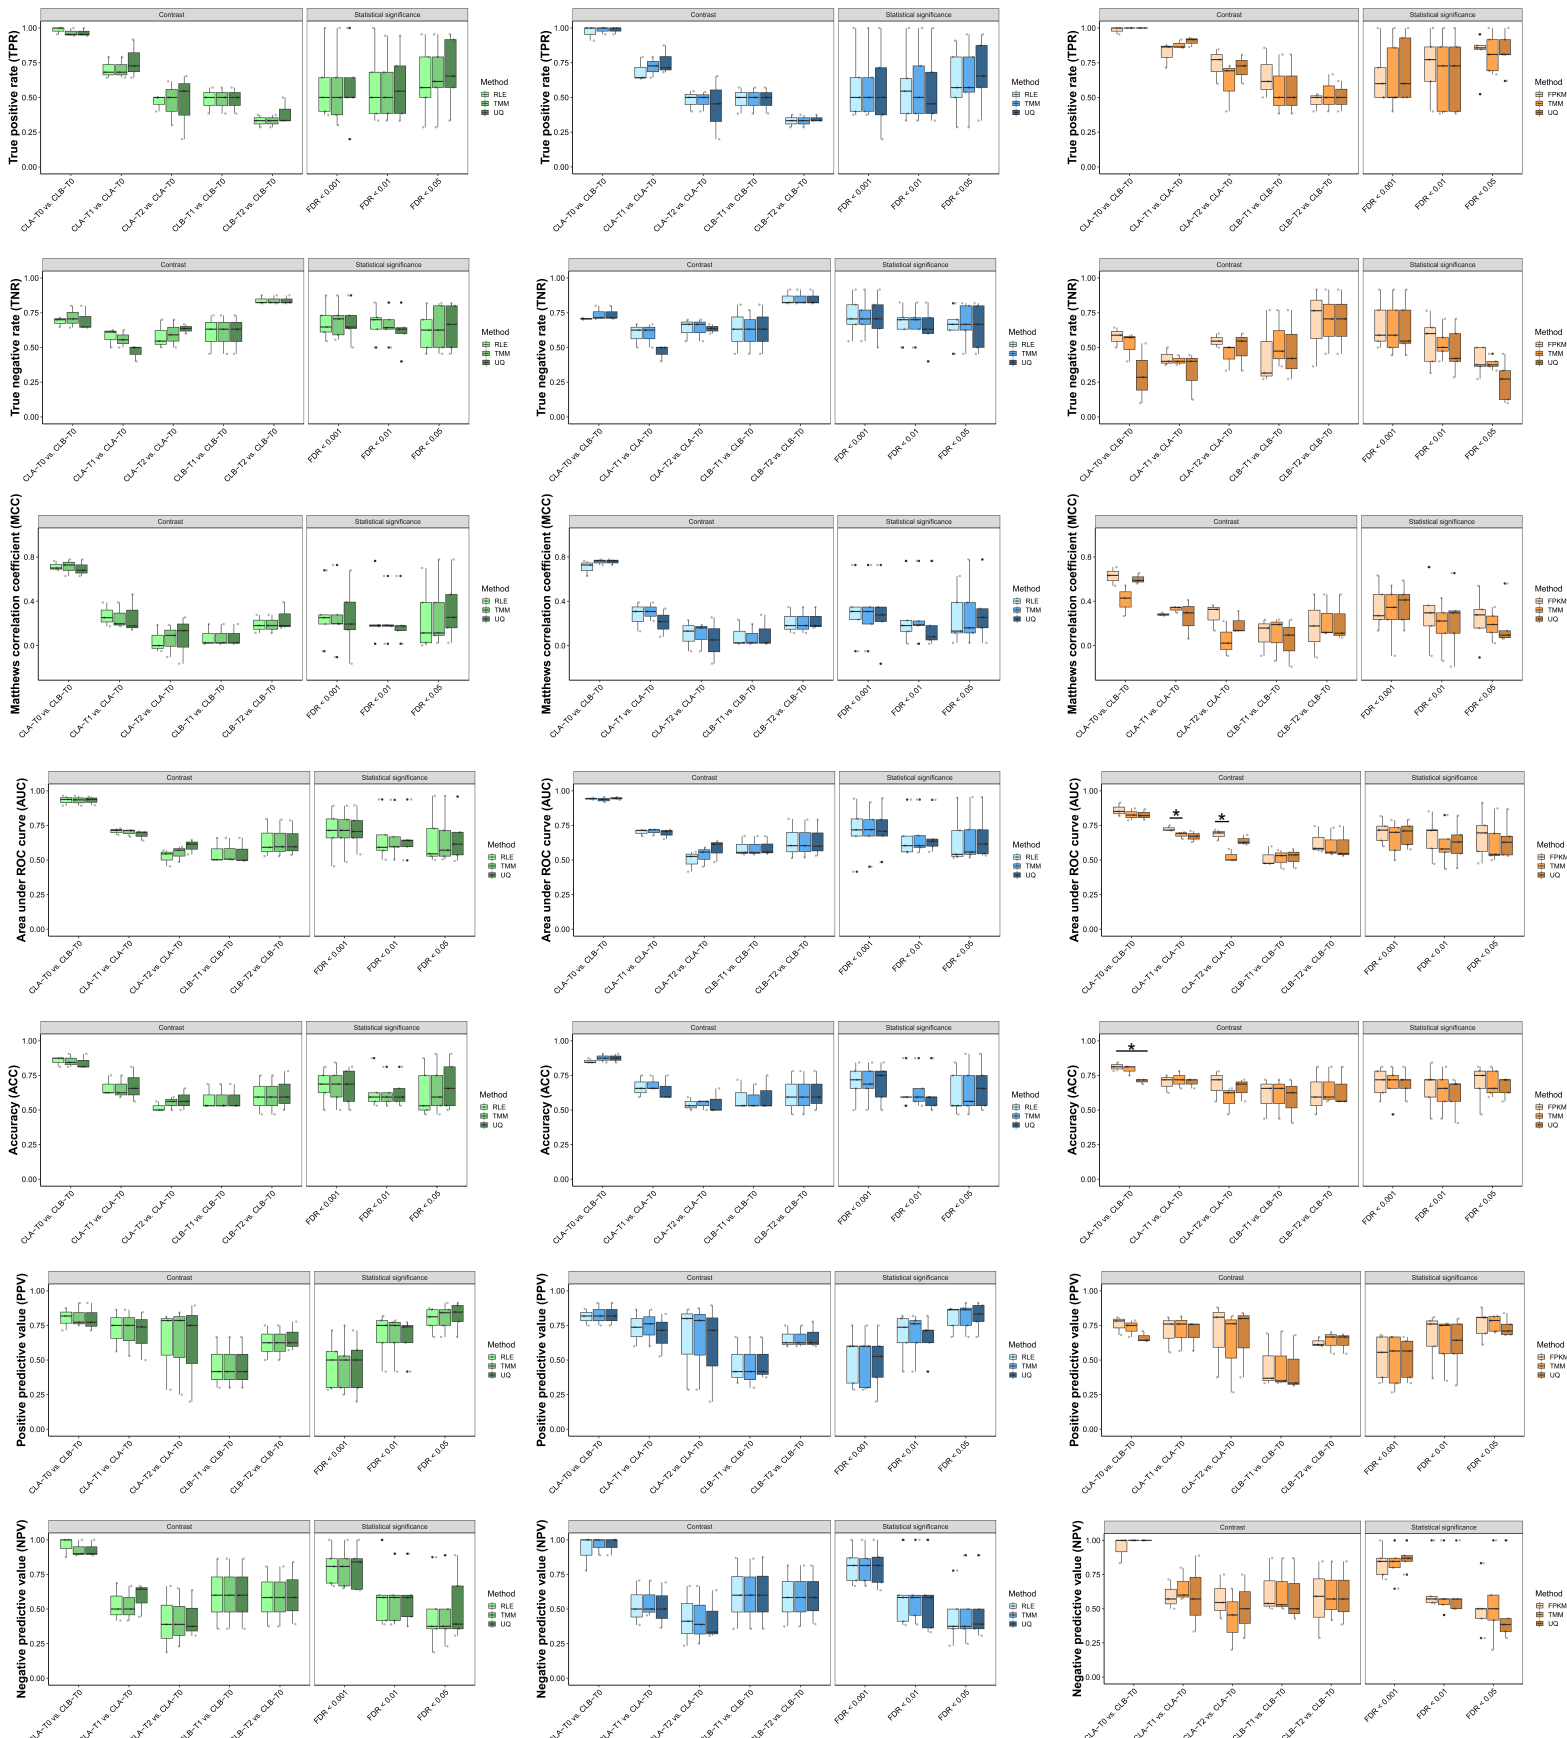

**Supplementary Figure S7:** Influence of normalization on differentially gene expression detection. Boxplot graphs were performed for the differential expression methods that admitted multiple normalization approaches (edgeR exact test, edgeR GLM and NOIseq) and represent the values of 7 diagnostic test parameters: true positive rate (TPR), true negative rate (TNR), Matthews correlation coefficient (MCC), accuracy (ACC), area under the ROC curve (AUC), positive predictive value (PPV) and negative predictive value (NPV). These parameters were measured at three FDR cut-off levels and five experimental contrasts, which are the result of the combination of two cell lines (CLA and CLB) with two treatment options (T1 and T2) and DMSO (T0). The asterisks indicate the significance of the post-hoc Dunn's test: \*  $p < 0.05$ , \*\*  $p < 0.01$  and \*\*\*  $p < 0.001$ . Comparisons without asterisk are statistically insignificant ( $p > 0.05$ ).



**Supplementary Table S1.** Initial number of reads for each of the analysed samples.

| Sample    | Input paired reads | Reads Q > 20 |            |              |
|-----------|--------------------|--------------|------------|--------------|
|           |                    | R1           | R2         | Mean R1 R2   |
| CLA-T0-S1 | 50,946,237         | 50,042,477   | 49,158,906 | 49,600,691.5 |
| CLA-T0-S2 | 62,571,514         | 60,745,925   | 59,593,922 | 60,169,923.5 |
| CLA-T0-S3 | 77,906,369         | 75,745,249   | 74,632,834 | 75,189,041.5 |
| CLB-T0-S1 | 46,810,430         | 46,097,180   | 45,536,869 | 45,817,024.5 |
| CLB-T0-S2 | 60,376,359         | 58,310,725   | 57,124,153 | 57,717,439   |
| CLB-T0-S3 | 40,840,185         | 39,720,525   | 39,264,085 | 39,492,305   |
| CLA-T1-S1 | 60,733,681         | 58,485,539   | 56,777,315 | 57,631,427   |
| CLA-T1-S2 | 66,024,375         | 64,206,003   | 63,222,987 | 63,714,495   |
| CLA-T1-S3 | 45,598,113         | 45,138,641   | 44,429,554 | 44,784,097.5 |
| CLB-T1-S1 | 37,568,155         | 36,970,927   | 36,711,895 | 36,841,411   |
| CLB-T1-S2 | 58,656,767         | 57,180,047   | 56,287,686 | 56,733,866.5 |
| CLB-T1-S3 | 64,447,257         | 62,685,537   | 62,013,794 | 62,349,665.5 |
| CLA-T2-S1 | 48,670,462         | 46,934,263   | 45,967,599 | 46,450,931   |
| CLA-T2-S2 | 40,156,676         | 39,052,670   | 38,459,170 | 38,755,920   |
| CLA-T2-S3 | 49,142,091         | 48,615,422   | 47,902,731 | 48,259,076.5 |
| CLB-T2-S1 | 36,240,231         | 35,637,569   | 34,837,372 | 35,237,470.5 |
| CLB-T2-S2 | 59,666,947         | 57,558,513   | 56,118,366 | 56,838,439.5 |
| CLB-T2-S3 | 41,733,924         | 40,510,376   | 39,886,662 | 40,198,519   |

**Supplementary Table S2.** List of the 107 genes selected for the pipeline precision analysis and the 32 genes selected (highlighted genes) for the pipeline accuracy analysis.

| Selected for qRT-PCR? | Ensembl ID      | HGNC symbol | Chromosome | Gene type      | Median MAD ranking |
|-----------------------|-----------------|-------------|------------|----------------|--------------------|
| Selected              | ENSG00000100138 | NHP2L1      | 22         | protein coding | 7                  |
| Selected              | ENSG00000105193 | RPS16       | 19         | protein coding | 7                  |
| Selected              | ENSG00000068697 | LAPTMA4     | 2          | protein coding | 8                  |
| Selected              | ENSG00000127884 | ECHS1       | 10         | protein coding | 10                 |
| Selected              | ENSG00000101361 | NOP56       | 20         | protein coding | 14                 |
| Selected              | ENSG00000165502 | RPL36AL     | 14         | protein coding | 14.5               |
| Selected              | ENSG00000154723 | ATP5J       | 21         | protein coding | 16                 |
| Selected              | ENSG00000143158 | MPC2        | 1          | protein coding | 16                 |
| Selected              | ENSG00000138279 | ANXA7       | 10         | protein coding | 17                 |
| Selected              | ENSG00000107223 | EDF1        | 9          | protein coding | 17                 |
| NO                    | ENSG00000163131 | CTSS        | 1          | protein coding | 17.5               |
| NO                    | ENSG00000156467 | UQCRB       | 8          | protein coding | 18.5               |
| NO                    | ENSG00000130255 | RPL36       | 19         | protein coding | 19                 |
| NO                    | ENSG00000178913 | TAF7        | 5          | protein coding | 20                 |
| NO                    | ENSG00000198961 | PJA2        | 5          | protein coding | 20.5               |
| NO                    | ENSG00000092820 | EZR         | 6          | protein coding | 21                 |
| NO                    | ENSG00000114391 | RPL24       | 3          | protein coding | 21                 |
| Selected              | ENSG00000142541 | RPL13A      | 19         | protein coding | 22                 |
| NO                    | ENSG00000164587 | RPS14       | 5          | protein coding | 22                 |
| NO                    | ENSG00000156482 | RPL30       | 8          | protein coding | 23                 |
| NO                    | ENSG00000151366 | NDUFC2      | 11         | protein coding | 24                 |
| NO                    | ENSG00000164919 | COX6C       | 8          | protein coding | 24.5               |
| NO                    | ENSG00000172115 | CYCS        | 7          | protein coding | 25.5               |
| NO                    | ENSG00000100348 | TXN2        | 22         | protein coding | 26                 |
| Selected              | ENSG00000147677 | EIF3H       | 8          | protein coding | 28                 |
| NO                    | ENSG00000183978 | COA3        | 17         | protein coding | 29                 |
| NO                    | ENSG00000125743 | SNRPD2      | 19         | protein coding | 29                 |
| NO                    | ENSG00000265681 | RPL17       | 18         | protein coding | 30                 |
| NO                    | ENSG00000169976 | SF3B5       | 6          | protein coding | 30                 |
| NO                    | ENSG00000198242 | RPL23A      | 17         | protein coding | 31                 |
| NO                    | ENSG00000178952 | TUFM        | 16         | protein coding | 33                 |
| NO                    | ENSG00000122566 | HNRNPA2B1   | 7          | protein coding | 34                 |
| NO                    | ENSG00000108107 | RPL28       | 19         | protein coding | 34                 |
| Selected              | ENSG00000166710 | B2M         | 15         | protein coding | 35                 |
| NO                    | ENSG00000170144 | HNRNPA3     | 2          | protein coding | 35                 |
| NO                    | ENSG00000196776 | CD47        | 3          | protein coding | 36                 |
| NO                    | ENSG00000099795 | NDUFB7      | 19         | protein coding | 37                 |
| NO                    | ENSG00000177700 | POLR2L      | 11         | protein coding | 37                 |
| NO                    | ENSG00000117614 | SYF2        | 1          | protein coding | 38                 |
| NO                    | ENSG00000115053 | NCL         | 2          | protein coding | 39                 |
| Selected              | ENSG00000161016 | RPL8        | 8          | protein coding | 39                 |
| NO                    | ENSG00000165119 | HNRNPK      | 9          | protein coding | 40                 |
| NO                    | ENSG00000244038 | DDOST       | 1          | protein coding | 42                 |
| NO                    | ENSG00000145592 | RPL37       | 5          | protein coding | 42                 |
| NO                    | ENSG00000147604 | RPL7        | 8          | protein coding | 43                 |
| NO                    | ENSG00000105583 | WDR83OS     | 19         | protein coding | 43                 |
| NO                    | ENSG00000164032 | H2AFZ       | 4          | protein coding | 44                 |
| NO                    | ENSG00000088832 | FKBP1A      | 20         | protein coding | 45                 |
| NO                    | ENSG00000070756 | PABPC1      | 8          | protein coding | 45                 |
| NO                    | ENSG00000115128 | SF3B14      | 2          | protein coding | 46.5               |
| Selected              | ENSG00000131495 | NDUFA2      | 5          | protein coding | 48                 |
| NO                    | ENSG00000096384 | HSP90AB1    | 6          | protein coding | 50                 |

|                 |                        |                 |           |                          |            |
|-----------------|------------------------|-----------------|-----------|--------------------------|------------|
| NO              | ENSG00000169714        | CNBP            | 3         | protein coding           | 51         |
| NO              | ENSG00000114850        | SSR3            | 3         | protein coding           | 54         |
| NO              | ENSG00000118418        | HMG3            | 6         | protein coding           | 55         |
| NO              | ENSG00000153187        | HNRNPU          | 1         | protein coding           | 56         |
| NO              | ENSG00000143162        | CREG1           | 1         | protein coding           | 57         |
| NO              | ENSG00000144713        | RPL32           | 3         | protein coding           | 57         |
| NO              | ENSG00000125835        | SNRPB           | 20        | protein coding           | 57         |
| NO              | ENSG00000143106        | PSMA5           | 1         | protein coding           | 59         |
| <b>Selected</b> | <b>ENSG00000142937</b> | <b>RPS8</b>     | <b>1</b>  | <b>protein coding</b>    | <b>59</b>  |
| NO              | ENSG00000135486        | HNRNPA1         | 12        | protein coding           | 61         |
| NO              | ENSG00000132646        | PCNA            | 20        | protein coding           | 61         |
| NO              | ENSG00000174444        | RPL4            | 15        | protein coding           | 64         |
| NO              | ENSG00000154518        | ATP5G3          | 2         | protein coding           | 66         |
| NO              | ENSG00000181163        | NPM1            | 5         | protein coding           | 66         |
| NO              | ENSG00000188612        | SUMO2           | 17        | protein coding           | 66         |
| <b>Selected</b> | <b>ENSG00000166337</b> | <b>TAF10</b>    | <b>11</b> | <b>protein coding</b>    | <b>66</b>  |
| NO              | ENSG00000170027        | YWHAG           | 7         | protein coding           | 67.5       |
| NO              | ENSG00000143612        | C1orf43         | 1         | protein coding           | 68         |
| NO              | ENSG00000239264        | TXNDC5          | 6         | protein coding           | 68         |
| NO              | ENSG00000164096        | C4orf3          | 4         | protein coding           | 72         |
| NO              | ENSG00000152795        | HNRNPDL         | 4         | protein coding           | 74         |
| NO              | ENSG00000134825        | TMEM258         | 11        | protein coding           | 74         |
| NO              | ENSG00000115484        | CCT4            | 2         | protein coding           | 75         |
| NO              | ENSG00000142864        | SERBP1          | 1         | protein coding           | 76         |
| <b>Selected</b> | <b>ENSG00000107581</b> | <b>EIF3A</b>    | <b>10</b> | <b>protein coding</b>    | <b>78</b>  |
| NO              | ENSG00000116251        | RPL22           | 1         | protein coding           | 78         |
| NO              | ENSG00000103363        | TCEB2           | 16        | protein coding           | 78         |
| NO              | ENSG00000134884        | ARGLU1          | 13        | protein coding           | 79         |
| NO              | ENSG00000185043        | CIB1            | 15        | protein coding           | 81         |
| NO              | ENSG00000166441        | RPL27A          | 11        | protein coding           | 81         |
| NO              | ENSG00000069275        | NUCKS1          | 1         | protein coding           | 82         |
| NO              | ENSG00000170348        | TMED10          | 14        | protein coding           | 82         |
| NO              | ENSG00000108518        | PFN1            | 17        | protein coding           | 83         |
| NO              | ENSG00000111897        | SERINC1         | 6         | protein coding           | 83         |
| <b>Selected</b> | <b>ENSG00000008018</b> | <b>PSMB1</b>    | <b>6</b>  | <b>protein coding</b>    | <b>86</b>  |
| NO              | ENSG00000196262        | PPIA            | 7         | protein coding           | 87         |
| NO              | ENSG00000137154        | RPS6            | 9         | protein coding           | 88         |
| NO              | ENSG00000111639        | MRPL51          | 12        | protein coding           | 89         |
| NO              | ENSG00000173113        | TRMT112         | 11        | protein coding           | 89         |
| NO              | ENSG00000152518        | ZFP36L2         | 2         | protein coding           | 89         |
| NO              | ENSG00000106153        | CHCHD2          | 7         | protein coding           | 93         |
| NO              | ENSG00000124767        | GLO1            | 6         | protein coding           | 93         |
| <b>Selected</b> | <b>ENSG00000178741</b> | <b>COX5A</b>    | <b>15</b> | <b>protein coding</b>    | <b>94</b>  |
| NO              | ENSG00000133639        | BTG1            | 12        | protein coding           | 95.5       |
| NO              | ENSG00000166562        | SEC11C          | 18        | protein coding           | 96         |
| <b>Selected</b> | <b>ENSG00000044574</b> | <b>HSPA5</b>    | <b>9</b>  | <b>protein coding</b>    | <b>97</b>  |
| <b>Selected</b> | <b>ENSG00000115758</b> | <b>ODC1</b>     | <b>2</b>  | <b>protein coding</b>    | <b>98</b>  |
| <b>Selected</b> | <b>ENSG00000182117</b> | <b>NOP10</b>    | <b>15</b> | <b>protein coding</b>    | <b>100</b> |
| <b>Selected</b> | <b>ENSG00000119421</b> | <b>NDUFA8</b>   | <b>9</b>  | <b>protein coding</b>    | <b>101</b> |
| <b>Selected</b> | <b>ENSG00000188264</b> | <b>IRF2BP2</b>  | <b>1</b>  | <b>protein coding</b>    | <b>102</b> |
| <b>Selected</b> | <b>ENSG00000183956</b> | <b>LRPAP1</b>   | <b>4</b>  | <b>protein coding</b>    | <b>102</b> |
| <b>Selected</b> | <b>ENSG00000085978</b> | <b>YBX1</b>     | <b>1</b>  | <b>protein coding</b>    | <b>104</b> |
| <b>Selected</b> | <b>ENSG00000105968</b> | <b>H2AFV</b>    | <b>7</b>  | <b>protein coding</b>    | <b>105</b> |
| <b>Selected</b> | <b>ENSG00000105887</b> | <b>MTPN</b>     | <b>7</b>  | <b>protein coding</b>    | <b>106</b> |
| <b>Selected</b> | <b>ENSG00000175130</b> | <b>MARCKSL1</b> | <b>1</b>  | <b>protein coding</b>    | <b>107</b> |
| <b>Selected</b> | <b>ENSG0000007562</b>  | <b>ACTB</b>     | <b>7</b>  | <b>Housekeeping gene</b> |            |

|                 |                        |              |           |                          |  |
|-----------------|------------------------|--------------|-----------|--------------------------|--|
| <b>Selected</b> | <b>ENSG00000111640</b> | <b>GAPDH</b> | <b>12</b> | <b>Housekeeping gene</b> |  |
|-----------------|------------------------|--------------|-----------|--------------------------|--|

\*Supplementary Table S2 legend:

|                                                                                         |                 |
|-----------------------------------------------------------------------------------------|-----------------|
| <b>Genes selected by the median absolute deviation (MAD) among all control samples:</b> | <b>Low MAD</b>  |
|                                                                                         | <b>High MAD</b> |
| <b>Randomly selected genes</b>                                                          |                 |
| <b>Selected Housekeeping genes</b>                                                      |                 |

**Supplementary Table S3.** Oligonucleotide probes used for the TaqMan qRT-PCR assay.

| Ensembl ID      | HGNC ID        | Chromosome | TaqMan Gene Expression ID assay | Source       | Identifier  |
|-----------------|----------------|------------|---------------------------------|--------------|-------------|
| ENSG0000008018  | PSMB1          | 6          | Hs00427357_m1                   | ThermoFisher | Cat#4448892 |
| ENSG00000044574 | HSPA5          | 9          | Hs00607129_gH                   | ThermoFisher | Cat#4448892 |
| ENSG00000065978 | YBX1           | 1          | Hs00358903_g1                   | ThermoFisher | Cat#4448892 |
| ENSG00000068697 | LAPTM4A        | 2          | Hs01092025_m1                   | ThermoFisher | Cat#4448892 |
| ENSG0000007562  | ACTB           | 7          | Hs01060665_g1                   | ThermoFisher | Cat#4448892 |
| ENSG00000100138 | NHP2L1 (SNU13) | 22         | Hs03025442_s1                   | ThermoFisher | Cat#4448892 |
| ENSG00000101361 | NOP56          | 20         | Hs00197340_m1                   | ThermoFisher | Cat#4448892 |
| ENSG00000105193 | RPS16          | 19         | Hs01598518_gH                   | ThermoFisher | Cat#4448892 |
| ENSG00000105887 | MTPN           | 7          | Hs00377581_m1                   | ThermoFisher | Cat#4448892 |
| ENSG00000105968 | H2AFV          | 7          | Hs00606542_mH                   | ThermoFisher | Cat#4448892 |
| ENSG00000107223 | EDF1           | 9          | Hs00610152_m1                   | ThermoFisher | Cat#4448892 |
| ENSG00000107581 | EIF3A          | 10         | Hs01025769_m1                   | ThermoFisher | Cat#4448892 |
| ENSG00000111640 | GAPDH          | 12         | Hs02786624_g1                   | ThermoFisher | Cat#4453320 |
| ENSG00000115758 | ODC1           | 2          | Hs00159739_m1                   | ThermoFisher | Cat#4453320 |
| ENSG00000119421 | NDUFA8         | 9          | Hs00204417_m1                   | ThermoFisher | Cat#4448892 |
| ENSG00000127884 | ECHS1          | 10         | Hs00187943_m1                   | ThermoFisher | Cat#4448892 |
| ENSG00000131495 | NDUFA2         | 5          | Hs04187282_g1                   | ThermoFisher | Cat#4448892 |
| ENSG00000138279 | ANXA7          | 10         | Hs00559410_m1                   | ThermoFisher | Cat#4448892 |
| ENSG00000142541 | RPL13A         | 19         | Hs04194366_g1                   | ThermoFisher | Cat#4448892 |
| ENSG00000142937 | RPS8           | 1          | Hs01374307_g1                   | ThermoFisher | Cat#4448892 |
| ENSG00000143158 | MPC2           | 1          | Hs00967250_m1                   | ThermoFisher | Cat#4448892 |
| ENSG00000147677 | EIF3H          | 8          | Hs00186779_m1                   | ThermoFisher | Cat#4448892 |
| ENSG00000154723 | ATP5J          | 21         | Hs01081389_g1                   | ThermoFisher | Cat#4448892 |
| ENSG00000161016 | RPL8           | 8          | Hs00361285_g1                   | ThermoFisher | Cat#4453320 |
| ENSG00000163956 | LRPAP1         | 4          | Hs00936301_m1                   | ThermoFisher | Cat#4448892 |
| ENSG00000165502 | RPL36AL        | 14         | Hs00733231_m1                   | ThermoFisher | Cat#4448892 |
| ENSG00000166337 | TAF10          | 11         | Hs00359540_g1                   | ThermoFisher | Cat#4448892 |
| ENSG00000166710 | B2M            | 15         | Hs00187842_m1                   | ThermoFisher | Cat#4453320 |
| ENSG00000168264 | IRF2BP2        | 1          | Hs02930738_m1                   | ThermoFisher | Cat#4448892 |
| ENSG00000175130 | MARCKSL1       | 1          | Hs00702769_s1                   | ThermoFisher | Cat#4448892 |
| ENSG00000178741 | COX5A          | 15         | Hs00362067_m1                   | ThermoFisher | Cat#4448892 |
| ENSG00000182117 | NOP10          | 15         | Hs00430282_m1                   | ThermoFisher | Cat#4448892 |

**Supplementary Table S4.** Precision analysis results

| Median precision (cell lines A and B) |             |      |                 |                  |                 |                      |
|---------------------------------------|-------------|------|-----------------|------------------|-----------------|----------------------|
| RANK position                         | Median RANK | MAD  | Trimming method | Alignment method | Counting method | Normalization method |
| 1                                     | 48.5        | 0.5  | Cutadapt        | Salmon-QMB-AUT   |                 | TPM                  |
| 2                                     | 49          | 0    | Cutadapt        | Salmon-FMD-AUT   |                 | TPM                  |
| 3                                     | 49          | 1    | Cutadapt        | Salmon-FMD-ISR   |                 | TPM                  |
| 4                                     | 50          | 1    | Cutadapt        | Salmon-QMB-ISR   |                 | TPM                  |
| 5                                     | 50.5        | 0.5  | Trimmomatic     | Salmon-QMB-AUT   |                 | TPM                  |
| 6                                     | 51.5        | 1.5  | Cutadapt        | Bowtie2          | RSEM            | TPM                  |
| 7                                     | 51.5        | 4.5  | BBDuk           | Salmon-FMD-ISR   |                 | TPM                  |
| 8                                     | 53.5        | 1.5  | Trimmomatic     | Salmon-QMB-ISR   |                 | TPM                  |
| 9                                     | 53.5        | 4.5  | Trimmomatic     | Salmon-FMD-AUT   |                 | TPM                  |
| 10                                    | 53.5        | 7.5  | BBDuk           | Salmon-FMD-AUT   |                 | TPM                  |
| 11                                    | 54          | 3    | Cutadapt        | TopHat2          | HTSeq INTER     | TMM                  |
| 12                                    | 54          | 4    | BBDuk           | Sailfish-ISR     |                 | TPM                  |
| 13                                    | 54          | 6    | Trimmomatic     | STAR             | RSEM            | TPM                  |
| 14                                    | 54.5        | 2.5  | BBDuk           | Salmon-QMB-AUT   |                 | TPM                  |
| 15                                    | 55          | 3    | Trimmomatic     | Salmon-FMD-ISR   |                 | TPM                  |
| 16                                    | 55          | 4    | Trimmomatic     | Bowtie2          | RSEM            | TPM                  |
| 17                                    | 55          | 5    | BBDuk           | Salmon-QMB-ISR   |                 | TPM                  |
| 18                                    | 56.5        | 2.5  | Cutadapt        | Sailfish-ISR     |                 | TPM                  |
| 19                                    | 56.5        | 3.5  | Cutadapt        | Kallisto         |                 | TPM                  |
| 20                                    | 56.5        | 4.5  | BBDuk           | Bowtie2          | RSEM            | TPM                  |
| 21                                    | 57          | 5    | Cutadapt        | STAR             | RSEM            | TPM                  |
| 22                                    | 58          | 10   | BBDuk           | Kallisto         |                 | TPM                  |
| 23                                    | 58.5        | 7.5  | BBDuk           | TopHat2          | HTSeq INTER     | RLE                  |
| 24                                    | 60.5        | 5.5  | BBDuk           | TopHat2          | HTSeq UNION     | RLE                  |
| 25                                    | 61          | 1    | BBDuk           | STAR             | Stringtie       | FPKM                 |
| 26                                    | 61          | 4    | BBDuk           | STAR             | RSEM            | TPM                  |
| 27                                    | 61.5        | 0.5  | Trimmomatic     | STAR             | Stringtie       | FPKM                 |
| 28                                    | 61.5        | 2.5  | Trimmomatic     | TopHat2          | Cufflinks       | FPKM                 |
| 29                                    | 61.5        | 8.5  | Trimmomatic     | TopHat2          | HTSeq INTER     | RLE                  |
| 30                                    | 62          | 2    | Cutadapt        | HiSat2           | HTSeq UNION     | TMM                  |
| 31                                    | 62          | 4    | Cutadapt        | STAR             | Stringtie       | FPKM                 |
| 32                                    | 62          | 4    | Cutadapt        | TopHat2          | HTSeq UNION     | RLE                  |
| 33                                    | 62.5        | 7.5  | Trimmomatic     | TopHat2          | HTSeq UNION     | RLE                  |
| 34                                    | 62.5        | 7.5  | Trimmomatic     | Kallisto         |                 | TPM                  |
| 35                                    | 62.5        | 9.5  | BBDuk           | TopHat2          | HTSeq INTER     | TMM                  |
| 36                                    | 62.5        | 12.5 | Cutadapt        | TopHat2          | HTSeq UNION     | TMM                  |
| 37                                    | 63          | 0    | Cutadapt        | TopHat2          | Cufflinks       | FPKM                 |
| 38                                    | 63          | 3    | Cutadapt        | HiSat2           | HTSeq UNION     | RLE                  |
| 39                                    | 63          | 6    | BBDuk           | HiSat2           | HTSeq INTER     | TMM                  |
| 40                                    | 63          | 8    | Cutadapt        | HiSat2           | HTSeq INTER     | RLE                  |

|    |      |      |             |              |             |      |
|----|------|------|-------------|--------------|-------------|------|
| 41 | 63   | 11   | Trimmomatic | HiSat2       | HTSeq INTER | RLE  |
| 42 | 63.5 | 4.5  | Trimmomatic | STAR         | HTSeq INTER | TMM  |
| 43 | 63.5 | 5.5  | Trimmomatic | RUM          | HTSeq UNION | RLE  |
| 44 | 63.5 | 10.5 | BBDuk       | HiSat2       | HTSeq UNION | TMM  |
| 45 | 63.5 | 12.5 | BBDuk       | TopHat2      | HTSeq UNION | TMM  |
| 46 | 64   | 1    | Trimmomatic | Bowtie2      | RSEM        | FPKM |
| 47 | 64   | 2    | BBDuk       | STAR         | Stringtie   | TPM  |
| 48 | 64   | 3    | BBDuk       | STAR         | Cufflinks   | FPKM |
| 49 | 64   | 9    | Cutadapt    | TopHat2      | HTSeq INTER | RLE  |
| 50 | 64   | 10   | BBDuk       | HiSat2       | HTSeq INTER | RLE  |
| 51 | 64.5 | 5.5  | Trimmomatic | HiSat2       | HTSeq INTER | TMM  |
| 52 | 64.5 | 7.5  | BBDuk       | STAR         | HTSeq INTER | RLE  |
| 53 | 65   | 3    | Cutadapt    | Bowtie2      | RSEM        | FPKM |
| 54 | 65   | 5    | BBDuk       | Bowtie2      | RSEM        | FPKM |
| 55 | 65   | 6    | BBDuk       | HiSat2       | HTSeq UNION | RLE  |
| 56 | 65   | 7    | Trimmomatic | HiSat2       | HTSeq UNION | RLE  |
| 57 | 65   | 11   | Trimmomatic | Sailfish-ISR |             | TPM  |
| 58 | 65.5 | 0.5  | Trimmomatic | STAR         | RSEM        | FPKM |
| 59 | 65.5 | 1.5  | BBDuk       | HiSat2       | Cufflinks   | FPKM |
| 60 | 65.5 | 6.5  | Trimmomatic | HiSat2       | HTSeq UNION | TMM  |
| 61 | 65.5 | 9.5  | Trimmomatic | TopHat2      | HTSeq INTER | TMM  |
| 62 | 66   | 1    | Cutadapt    | STAR         | RSEM        | FPKM |
| 63 | 66   | 9    | Trimmomatic | RUM          | HTSeq INTER | RLE  |
| 64 | 66.5 | 2.5  | BBDuk       | TopHat2      | Cufflinks   | FPKM |
| 65 | 67.5 | 0.5  | BBDuk       | STAR         | RSEM        | FPKM |
| 66 | 67.5 | 4.5  | Cutadapt    | STAR         | Stringtie   | TPM  |
| 67 | 67.5 | 5.5  | Cutadapt    | STAR         | HTSeq UNION | TMM  |
| 68 | 67.5 | 12.5 | Trimmomatic | STAR         | Stringtie   | TPM  |
| 69 | 68   | 3    | Trimmomatic | STAR         | Cufflinks   | FPKM |
| 70 | 68   | 3    | BBDuk       | STAR         | HTSeq UNION | RLE  |
| 71 | 68   | 7    | BBDuk       | STAR         | HTSeq UNION | TMM  |
| 72 | 68.5 | 7.5  | Trimmomatic | RUM          | HTSeq INTER | TMM  |
| 73 | 68.5 | 8.5  | Trimmomatic | RUM          | HTSeq UNION | TMM  |
| 74 | 69   | 8    | Trimmomatic | STAR         | HTSeq UNION | TMM  |
| 75 | 69   | 9    | Trimmomatic | TopHat2      | HTSeq UNION | TMM  |
| 76 | 70   | 1    | Trimmomatic | HiSat2       | Cufflinks   | FPKM |
| 77 | 70   | 10   | BBDuk       | RUM          | HTSeq UNION | TMM  |
| 78 | 70.5 | 9.5  | Cutadapt    | STAR         | Cufflinks   | FPKM |
| 79 | 71   | 6    | Trimmomatic | STAR         | HTSeq INTER | RLE  |
| 80 | 71   | 8    | BBDuk       | STAR         | HTSeq INTER | TMM  |
| 81 | 72   | 13   | Cutadapt    | RUM          | Cufflinks   | FPKM |
| 82 | 72.5 | 9.5  | Trimmomatic | RUM          | Cufflinks   | FPKM |
| 83 | 73   | 5    | BBDuk       | RUM          | HTSeq INTER | TMM  |
| 84 | 73.5 | 20.5 | Cutadapt    | STAR         | HTSeq INTER | TMM  |
| 85 | 74   | 4    | Cutadapt    | HiSat2       | Cufflinks   | FPKM |

|            |       |      |             |         |             |            |
|------------|-------|------|-------------|---------|-------------|------------|
| <b>86</b>  | 74    | 11   | Trimmomatic | STAR    | HTSeq UNION | RLE        |
| <b>87</b>  | 75    | 2    | Cutadapt    | HiSat2  | HTSeq INTER | TMM        |
| <b>88</b>  | 75.5  | 14.5 | BBDuk       | TopHat2 | Stringtie   | TPM        |
| <b>89</b>  | 76    | 0    | BBDuk       | TopHat2 | Stringtie   | FPKM       |
| <b>90</b>  | 76    | 1    | Cutadapt    | TopHat2 | Stringtie   | FPKM       |
| <b>91</b>  | 76.5  | 6.5  | Cutadapt    | TopHat2 | Stringtie   | TPM        |
| <b>92</b>  | 78.5  | 2.5  | Trimmomatic | TopHat2 | Stringtie   | FPKM       |
| <b>93</b>  | 78.5  | 8.5  | Trimmomatic | TopHat2 | Stringtie   | TPM        |
| <b>94</b>  | 80    | 2    | BBDuk       | RUM     | HTSeq UNION | RLE        |
| <b>95</b>  | 80.5  | 19.5 | BBDuk       | RUM     | Cufflinks   | FPKM       |
| <b>96</b>  | 82    | 0    | BBDuk       | HiSat2  | Stringtie   | FPKM       |
| <b>97</b>  | 82    | 0    | BBDuk       | RUM     | HTSeq INTER | RLE        |
| <b>98</b>  | 82.5  | 9.5  | Cutadapt    | STAR    | HTSeq INTER | RLE        |
| <b>99</b>  | 84.5  | 1.5  | BBDuk       | RUM     | Stringtie   | FPKM       |
| <b>100</b> | 84.5  | 3.5  | BBDuk       | HiSat2  | Stringtie   | TPM        |
| <b>101</b> | 84.5  | 9.5  | Cutadapt    | RUM     | Stringtie   | TPM        |
| <b>102</b> | 85    | 6    | Cutadapt    | RUM     | HTSeq INTER | TMM        |
| <b>103</b> | 85    | 11   | Cutadapt    | STAR    | HTSeq UNION | RLE        |
| <b>104</b> | 85.5  | 1.5  | BBDuk       | RUM     | Stringtie   | TPM        |
| <b>105</b> | 86    | 6    | Cutadapt    | RUM     | HTSeq UNION | TMM        |
| <b>106</b> | 86.5  | 2.5  | Trimmomatic | RUM     | Stringtie   | FPKM       |
| <b>107</b> | 87    | 4    | Cutadapt    | HiSat2  | Stringtie   | FPKM       |
| <b>108</b> | 87.5  | 2.5  | Cutadapt    | RUM     | HTSeq INTER | RLE        |
| <b>109</b> | 87.5  | 4.5  | Cutadapt    | RUM     | HTSeq UNION | RLE        |
| <b>110</b> | 87.5  | 4.5  | Cutadapt    | RUM     | Stringtie   | FPKM       |
| <b>111</b> | 88    | 5    | Trimmomatic | HiSat2  | Stringtie   | FPKM       |
| <b>112</b> | 88.5  | 3.5  | Cutadapt    | HiSat2  | Stringtie   | TPM        |
| <b>113</b> | 90    | 4    | Trimmomatic | HiSat2  | Stringtie   | TPM        |
| <b>114</b> | 90    | 4    | Trimmomatic | RUM     | Stringtie   | TPM        |
| <b>115</b> | 102.5 | 8.5  | Cutadapt    | STAR    | eXpress     | TPM        |
| <b>116</b> | 103.5 | 6.5  | Cutadapt    | STAR    | eXpress     | FPKM       |
| <b>117</b> | 109   | 2    | BBDuk       | STAR    | eXpress     | FPKM       |
| <b>118</b> | 109.5 | 0.5  | Trimmomatic | STAR    | eXpress     | TPM        |
| <b>119</b> | 112.5 | 2.5  | Trimmomatic | STAR    | eXpress     | FPKM       |
| <b>120</b> | 113   | 3    | BBDuk       | STAR    | eXpress     | TPM        |
| <b>121</b> | 113.5 | 9.5  | Cutadapt    | Bowtie2 | eXpress     | FPKM       |
| <b>122</b> | 114   | 6    | Cutadapt    | Bowtie2 | eXpress     | TPM        |
| <b>123</b> | 118.5 | 3.5  | BBDuk       | Bowtie2 | eXpress     | TPM        |
| <b>124</b> | 118.5 | 4.5  | BBDuk       | Bowtie2 | eXpress     | FPKM       |
| <b>125</b> | 119   | 4    | Trimmomatic | Bowtie2 | eXpress     | TPM        |
| <b>126</b> | 120.5 | 0.5  | Trimmomatic | Bowtie2 | eXpress     | FPKM       |
| <b>127</b> | 139.5 | 11.5 | BBDuk       | RUM     | Stringtie   | Coverage   |
| <b>128</b> | 140   | 6    | BBDuk       | STAR    | eXpress     | Eff_Counts |
| <b>129</b> | 140   | 10   | Trimmomatic | HiSat2  | HTSeq INTER | Raw        |
| <b>130</b> | 141   | 3    | BBDuk       | HiSat2  | Stringtie   | Coverage   |



|     |       |      |             |                |             |            |
|-----|-------|------|-------------|----------------|-------------|------------|
| 131 | 141   | 11   | Trimmomatic | HiSat2         | HTSeq UNION | Raw        |
| 132 | 141   | 14   | Trimmomatic | RUM            | Stringtie   | Coverage   |
| 133 | 141.5 | 2.5  | BBDuk       | TopHat2        | Stringtie   | Coverage   |
| 134 | 141.5 | 5.5  | BBDuk       | STAR           | eXpress     | Est_Count  |
| 135 | 142   | 10   | BBDuk       | Bowtie2        | eXpress     | Eff_Counts |
| 136 | 143   | 6    | BBDuk       | HiSat2         | HTSeq INTER | Raw        |
| 137 | 143   | 10   | BBDuk       | Salmon-FMD-ISR |             | NumReads   |
| 138 | 143   | 11   | BBDuk       | Salmon-FMD-AUT |             | NumReads   |
| 139 | 143.5 | 0.5  | BBDuk       | STAR           | Stringtie   | Coverage   |
| 140 | 143.5 | 7.5  | BBDuk       | HiSat2         | HTSeq UNION | Raw        |
| 141 | 144.5 | 3.5  | BBDuk       | Bowtie2        | eXpress     | Est_Count  |
| 142 | 145   | 3    | BBDuk       | Kallisto       |             | Est-Counts |
| 143 | 145.5 | 18.5 | Trimmomatic | Sailfish-ISR   |             | NumReads   |
| 144 | 146   | 4    | BBDuk       | STAR           | HTSeq INTER | Raw        |
| 145 | 146   | 5    | BBDuk       | Salmon-QMB-AUT |             | NumReads   |
| 146 | 146   | 9    | Trimmomatic | STAR           | eXpress     | Eff_Counts |
| 147 | 146   | 13   | Trimmomatic | HiSat2         | Stringtie   | Coverage   |
| 148 | 146.5 | 3.5  | BBDuk       | Sailfish-ISR   |             | NumReads   |
| 149 | 146.5 | 4.5  | BBDuk       | TopHat2        | HTSeq INTER | Raw        |
| 150 | 147   | 4    | BBDuk       | Salmon-QMB-ISR |             | NumReads   |
| 151 | 147   | 7    | BBDuk       | TopHat2        | HTSeq UNION | Raw        |
| 152 | 147.5 | 5.5  | BBDuk       | STAR           | HTSeq UNION | Raw        |
| 153 | 147.5 | 13.5 | Trimmomatic | RUM            | HTSeq INTER | Raw        |
| 154 | 148.5 | 16.5 | Trimmomatic | TopHat2        | Stringtie   | Coverage   |
| 155 | 149   | 6    | Trimmomatic | STAR           | eXpress     | Est_Count  |
| 156 | 149   | 13   | Trimmomatic | RUM            | HTSeq UNION | Raw        |
| 157 | 151   | 9    | Trimmomatic | Salmon-FMD-ISR |             | NumReads   |
| 158 | 151.5 | 8.5  | Trimmomatic | Salmon-FMD-AUT |             | NumReads   |
| 159 | 151.5 | 8.5  | BBDuk       | RUM            | HTSeq INTER | Raw        |
| 160 | 154   | 11   | Trimmomatic | Kallisto       |             | Est-Counts |
| 161 | 154.5 | 7.5  | BBDuk       | RUM            | HTSeq UNION | Raw        |
| 162 | 154.5 | 9.5  | Trimmomatic | Salmon-QMB-ISR |             | NumReads   |
| 163 | 155   | 11   | Trimmomatic | TopHat2        | HTSeq INTER | Raw        |
| 164 | 155.5 | 12.5 | Trimmomatic | STAR           | HTSeq INTER | Raw        |
| 165 | 156   | 13   | Trimmomatic | STAR           | Stringtie   | Coverage   |
| 166 | 156.5 | 2.5  | Cutadapt    | STAR           | eXpress     | Est_Count  |
| 167 | 157   | 9    | Trimmomatic | TopHat2        | HTSeq UNION | Raw        |
| 168 | 157   | 12   | Trimmomatic | STAR           | HTSeq UNION | Raw        |
| 169 | 157.5 | 0.5  | Trimmomatic | Bowtie2        | eXpress     | Eff_Counts |
| 170 | 159.5 | 0.5  | Cutadapt    | Kallisto       |             | Est-Counts |
| 171 | 160   | 8    | Cutadapt    | Salmon-FMD-AUT |             | NumReads   |
| 172 | 160.5 | 7.5  | Cutadapt    | Salmon-FMD-ISR |             | NumReads   |
| 173 | 162   | 3    | Cutadapt    | Sailfish-ISR   |             | NumReads   |
| 174 | 162.5 | 4.5  | Cutadapt    | Salmon-QMB-AUT |             | NumReads   |

|            |       |     |             |                |             |            |
|------------|-------|-----|-------------|----------------|-------------|------------|
| <b>175</b> | 162.5 | 4.5 | Cutadapt    | Salmon-QMB-ISR |             | NumReads   |
| <b>176</b> | 162.5 | 6.5 | Cutadapt    | HiSat2         | HTSeq INTER | Raw        |
| <b>177</b> | 163   | 7   | Cutadapt    | HiSat2         | HTSeq UNION | Raw        |
| <b>178</b> | 163.5 | 5.5 | Trimmomatic | Bowtie2        | eXpress     | Est_Count  |
| <b>179</b> | 164   | 7   | Cutadapt    | STAR           | eXpress     | Eff_Counts |
| <b>180</b> | 164.5 | 0.5 | Cutadapt    | Bowtie2        | eXpress     | Est_Count  |
| <b>181</b> | 165   | 5   | Cutadapt    | RUM            | Stringtie   | Coverage   |
| <b>182</b> | 167.5 | 0.5 | Cutadapt    | HiSat2         | Stringtie   | Coverage   |
| <b>183</b> | 167.5 | 2.5 | Cutadapt    | TopHat2        | Stringtie   | Coverage   |
| <b>184</b> | 169.5 | 0.5 | Cutadapt    | RUM            | HTSeq INTER | Raw        |
| <b>185</b> | 169.5 | 1.5 | Cutadapt    | STAR           | Stringtie   | Coverage   |
| <b>186</b> | 169.5 | 3.5 | Cutadapt    | Bowtie2        | eXpress     | Eff_Counts |
| <b>187</b> | 170.5 | 4.5 | Cutadapt    | TopHat2        | HTSeq INTER | Raw        |
| <b>188</b> | 171   | 1   | Cutadapt    | RUM            | HTSeq UNION | Raw        |
| <b>189</b> | 172.5 | 0.5 | Cutadapt    | STAR           | HTSeq INTER | Raw        |
| <b>190</b> | 173   | 1   | Cutadapt    | STAR           | HTSeq UNION | Raw        |
| <b>191</b> | 173.5 | 4.5 | Cutadapt    | TopHat2        | HTSeq UNION | Raw        |
| <b>192</b> | 177   | 12  | Trimmomatic | Salmon-QMB-AUT |             | NumReads   |

**Supplementary Table S5.** Accuracy analysis results.

| <b>Median accuracy (cell lines A and B)</b> |                    |            |                        |                         |                        |                             |
|---------------------------------------------|--------------------|------------|------------------------|-------------------------|------------------------|-----------------------------|
| <b>RANK position</b>                        | <b>Median RANK</b> | <b>MAD</b> | <b>Trimming method</b> | <b>Alignment method</b> | <b>Counting method</b> | <b>Normalization method</b> |
| 1                                           | 27.5               | 18.5       | Trimmomatic            | Sailfish-ISR            |                        | NumReads                    |
| 2                                           | 56                 | 18.5       | Trimmomatic            | RUM                     | HTSeq UNION            | TMM                         |
| 3                                           | 56.5               | 30         | BBDuk                  | RUM                     | HTSeq UNION            | TMM                         |
| 4                                           | 56.75              | 25.75      | Cutadapt               | RUM                     | HTSeq INTER            | TMM                         |
| 5                                           | 57.75              | 20.75      | Trimmomatic            | RUM                     | HTSeq INTER            | TMM                         |
| 6                                           | 58.25              | 24.25      | Cutadapt               | RUM                     | HTSeq UNION            | TMM                         |
| 7                                           | 62                 | 32         | BBDuk                  | RUM                     | HTSeq INTER            | TMM                         |
| 8                                           | 62                 | 37.5       | BBDuk                  | STAR                    | HTSeq UNION            | TMM                         |
| 9                                           | 64.75              | 8.25       | Trimmomatic            | STAR                    | HTSeq UNION            | TMM                         |
| 10                                          | 66.75              | 14.75      | Trimmomatic            | TopHat2                 | HTSeq UNION            | TMM                         |
| 11                                          | 67.75              | 22.75      | Cutadapt               | TopHat2                 | HTSeq UNION            | TMM                         |
| 12                                          | 68                 | 23.5       | BBDuk                  | TopHat2                 | HTSeq UNION            | TMM                         |
| 13                                          | 69.25              | 27.25      | BBDuk                  | HiSat2                  | HTSeq UNION            | TMM                         |
| 14                                          | 69.5               | 20.5       | Trimmomatic            | HiSat2                  | HTSeq UNION            | TMM                         |
| 15                                          | 70.5               | 20.5       | BBDuk                  | TopHat2                 | HTSeq INTER            | TMM                         |
| 16                                          | 71                 | 12         | Trimmomatic            | STAR                    | HTSeq INTER            | TMM                         |
| 17                                          | 72.25              | 39.25      | BBDuk                  | STAR                    | HTSeq INTER            | TMM                         |
| 18                                          | 72.5               | 24.5       | Cutadapt               | HiSat2                  | HTSeq INTER            | TMM                         |
| 19                                          | 73                 | 19.5       | Trimmomatic            | TopHat2                 | HTSeq INTER            | TMM                         |
| 20                                          | 73.75              | 41.25      | Trimmomatic            | RUM                     | HTSeq UNION            | RLE                         |
| 21                                          | 76.25              | 26.75      | Trimmomatic            | HiSat2                  | HTSeq INTER            | TMM                         |
| 22                                          | 76.5               | 28         | Cutadapt               | STAR                    | HTSeq UNION            | RLE                         |
| 23                                          | 77.25              | 27.25      | Cutadapt               | STAR                    | HTSeq INTER            | RLE                         |
| 24                                          | 79                 | 51         | BBDuk                  | RUM                     | HTSeq UNION            | RLE                         |
| 25                                          | 80.25              | 51.75      | BBDuk                  | RUM                     | HTSeq INTER            | RLE                         |
| 26                                          | 80.75              | 39.25      | Trimmomatic            | RUM                     | HTSeq INTER            | RLE                         |
| 27                                          | 81.75              | 36.75      | Trimmomatic            | RUM                     | Stringtie              | Coverage                    |
| 28                                          | 82.5               | 15.5       | BBDuk                  | STAR                    | Stringtie              | TPM                         |
| 29                                          | 82.5               | 36         | Cutadapt               | RUM                     | Cufflinks              | FPKM                        |
| 30                                          | 82.75              | 13.25      | Cutadapt               | STAR                    | Cufflinks              | FPKM                        |
| 31                                          | 83.25              | 20.75      | Cutadapt               | STAR                    | HTSeq UNION            | TMM                         |
| 32                                          | 85.75              | 27.25      | Trimmomatic            | Bowtie2                 | eXpress                | Eff_Counts                  |
| 33                                          | 86                 | 38.5       | Trimmomatic            | HiSat2                  | HTSeq INTER            | Raw                         |
| 34                                          | 86                 | 43.5       | Trimmomatic            | RUM                     | HTSeq INTER            | Raw                         |
| 35                                          | 86.25              | 1.75       | Cutadapt               | STAR                    | HTSeq INTER            | TMM                         |
| 36                                          | 86.75              | 38.25      | Trimmomatic            | HiSat2                  | HTSeq UNION            | Raw                         |
| 37                                          | 87.25              | 44.75      | Trimmomatic            | RUM                     | HTSeq UNION            | Raw                         |
| 38                                          | 87.5               | 26.5       | BBDuk                  | HiSat2                  | HTSeq INTER            | TMM                         |
| 39                                          | 88                 | 41         | Cutadapt               | RUM                     | HTSeq INTER            | RLE                         |
| 40                                          | 88.5               | 32         | BBDuk                  | RUM                     | Stringtie              | Coverage                    |

|    |       |       |             |                |             |            |
|----|-------|-------|-------------|----------------|-------------|------------|
| 41 | 88.5  | 41.5  | Trimmomatic | TopHat2        | Stringtie   | Coverage   |
| 42 | 88.75 | 19.25 | Cutadapt    | HiSat2         | Cufflinks   | FPKM       |
| 43 | 88.75 | 44.25 | Cutadapt    | RUM            | HTSeq UNION | RLE        |
| 44 | 89.5  | 16    | Trimmomatic | STAR           | Cufflinks   | FPKM       |
| 45 | 89.5  | 46.5  | BBDuk       | RUM            | HTSeq INTER | Raw        |
| 46 | 89.75 | 40.75 | Trimmomatic | HiSat2         | Stringtie   | Coverage   |
| 47 | 90    | 65    | BBDuk       | RUM            | Cufflinks   | FPKM       |
| 48 | 90.25 | 35.75 | Trimmomatic | STAR           | Stringtie   | FPKM       |
| 49 | 90.25 | 61.25 | BBDuk       | STAR           | HTSeq UNION | RLE        |
| 50 | 91    | 20    | Trimmomatic | STAR           | Stringtie   | TPM        |
| 51 | 91.75 | 46.25 | BBDuk       | RUM            | HTSeq UNION | Raw        |
| 52 | 92    | 19.5  | Trimmomatic | HiSat2         | Cufflinks   | FPKM       |
| 53 | 92    | 42    | BBDuk       | STAR           | Stringtie   | FPKM       |
| 54 | 92    | 47.5  | Trimmomatic | RUM            | Cufflinks   | FPKM       |
| 55 | 92.25 | 5.25  | Trimmomatic | STAR           | eXpress     | FPKM       |
| 56 | 92.5  | 39.5  | Trimmomatic | Kallisto       |             | Est-Counts |
| 57 | 93    | 30.5  | Cutadapt    | HiSat2         | HTSeq UNION | TMM        |
| 58 | 93.5  | 44    | Trimmomatic | Salmon-FMD-ISR |             | NumReads   |
| 59 | 93.75 | 24.25 | Trimmomatic | STAR           | HTSeq INTER | RLE        |
| 60 | 94    | 25    | BBDuk       | Bowtie2        | eXpress     | Eff_Counts |
| 61 | 94.25 | 25.25 | Trimmomatic | STAR           | HTSeq UNION | RLE        |
| 62 | 94.25 | 43.75 | Trimmomatic | Salmon-FMD-AUT |             | NumReads   |
| 63 | 94.25 | 47.25 | Trimmomatic | Salmon-QMB-ISR |             | NumReads   |
| 64 | 94.25 | 49.75 | BBDuk       | HiSat2         | HTSeq UNION | RLE        |
| 65 | 94.5  | 32    | Trimmomatic | STAR           | eXpress     | Eff_Counts |
| 66 | 94.75 | 28.25 | Trimmomatic | Bowtie2        | eXpress     | Est_Count  |
| 67 | 94.75 | 38.75 | Cutadapt    | STAR           | Stringtie   | FPKM       |
| 68 | 94.75 | 41.25 | Trimmomatic | STAR           | Stringtie   | Coverage   |
| 69 | 95    | 45    | Trimmomatic | STAR           | HTSeq INTER | Raw        |
| 70 | 95    | 46    | Trimmomatic | TopHat2        | HTSeq UNION | Raw        |
| 71 | 95    | 46.5  | Trimmomatic | STAR           | HTSeq UNION | Raw        |
| 72 | 95    | 61    | BBDuk       | STAR           | HTSeq INTER | RLE        |
| 73 | 95.25 | 4.25  | Cutadapt    | HiSat2         | Stringtie   | TPM        |
| 74 | 95.5  | 33    | Trimmomatic | STAR           | eXpress     | Est_Count  |
| 75 | 95.75 | 25.25 | Cutadapt    | STAR           | Stringtie   | TPM        |
| 76 | 96    | 45.5  | Trimmomatic | TopHat2        | HTSeq INTER | Raw        |
| 77 | 96.5  | 5.5   | Cutadapt    | RUM            | Stringtie   | TPM        |
| 78 | 97    | 21.5  | BBDuk       | Bowtie2        | RSEM        | FPKM       |
| 79 | 97.25 | 36.75 | Cutadapt    | HiSat2         | HTSeq INTER | RLE        |
| 80 | 97.5  | 0     | Trimmomatic | Bowtie2        | eXpress     | FPKM       |
| 81 | 97.5  | 52    | BBDuk       | HiSat2         | HTSeq INTER | RLE        |
| 82 | 98    | 25    | BBDuk       | Bowtie2        | eXpress     | Est_Count  |
| 83 | 98.25 | 27.75 | Cutadapt    | STAR           | RSEM        | FPKM       |
| 84 | 98.75 | 28.75 | BBDuk       | HiSat2         | Cufflinks   | FPKM       |
| 85 | 99.25 | 20.75 | Trimmomatic | HiSat2         | Stringtie   | FPKM       |

|     |        |       |             |                |             |          |
|-----|--------|-------|-------------|----------------|-------------|----------|
| 86  | 99.25  | 32.25 | Trimmomatic | STAR           | RSEM        | FPKM     |
| 87  | 99.75  | 22.75 | Cutadapt    | Bowtie2        | RSEM        | FPKM     |
| 88  | 99.75  | 38.25 | Cutadapt    | HiSat2         | HTSeq UNION | RLE      |
| 89  | 100    | 29.5  | Trimmomatic | TopHat2        | Cufflinks   | FPKM     |
| 90  | 100.25 | 13.75 | BBDuk       | RUM            | Stringtie   | TPM      |
| 91  | 100.25 | 24.75 | Trimmomatic | Bowtie2        | RSEM        | FPKM     |
| 92  | 101.25 | 24.75 | BBDuk       | STAR           | Cufflinks   | FPKM     |
| 93  | 101.25 | 31.25 | BBDuk       | TopHat2        | Cufflinks   | FPKM     |
| 94  | 101.5  | 26    | BBDuk       | STAR           | RSEM        | FPKM     |
| 95  | 101.5  | 46    | BBDuk       | TopHat2        | HTSeq INTER | RLE      |
| 96  | 101.75 | 38.75 | Cutadapt    | RUM            | Stringtie   | FPKM     |
| 97  | 102    | 31    | Cutadapt    | TopHat2        | Cufflinks   | FPKM     |
| 98  | 102.5  | 37.5  | BBDuk       | TopHat2        | Stringtie   | Coverage |
| 99  | 102.5  | 41    | Trimmomatic | HiSat2         | HTSeq UNION | RLE      |
| 100 | 102.75 | 4.25  | BBDuk       | HiSat2         | Stringtie   | TPM      |
| 101 | 102.75 | 10.75 | Trimmomatic | HiSat2         | Stringtie   | TPM      |
| 102 | 102.75 | 35.25 | BBDuk       | RUM            | Stringtie   | FPKM     |
| 103 | 102.75 | 44.75 | Trimmomatic | TopHat2        | HTSeq INTER | RLE      |
| 104 | 102.75 | 49.25 | Cutadapt    | TopHat2        | HTSeq INTER | RLE      |
| 105 | 103    | 24    | Cutadapt    | HiSat2         | Stringtie   | FPKM     |
| 106 | 103.25 | 0.75  | Trimmomatic | Bowtie2        | RSEM        | TPM      |
| 107 | 103.25 | 2.75  | Trimmomatic | TopHat2        | Stringtie   | TPM      |
| 108 | 103.25 | 36.25 | BBDuk       | HiSat2         | Stringtie   | Coverage |
| 109 | 103.75 | 3.25  | BBDuk       | STAR           | eXpress     | FPKM     |
| 110 | 104    | 30    | Trimmomatic | TopHat2        | Stringtie   | FPKM     |
| 111 | 104.25 | 28.75 | BBDuk       | HiSat2         | Stringtie   | FPKM     |
| 112 | 104.25 | 43.75 | Trimmomatic | HiSat2         | HTSeq INTER | RLE      |
| 113 | 104.5  | 1.5   | Cutadapt    | STAR           | eXpress     | FPKM     |
| 114 | 104.5  | 4     | Cutadapt    | Bowtie2        | RSEM        | TPM      |
| 115 | 104.5  | 8.5   | Trimmomatic | RUM            | Stringtie   | TPM      |
| 116 | 105.25 | 6.75  | BBDuk       | Salmon-QMB-AUT |             | TPM      |
| 117 | 105.25 | 33.75 | BBDuk       | STAR           | Stringtie   | Coverage |
| 118 | 105.25 | 44.75 | BBDuk       | HiSat2         | HTSeq INTER | Raw      |
| 119 | 105.25 | 56.75 | Cutadapt    | RUM            | Stringtie   | Coverage |
| 120 | 105.5  | 15.5  | BBDuk       | TopHat2        | Stringtie   | TPM      |
| 121 | 106    | 7     | BBDuk       | Salmon-QMB-ISR |             | TPM      |
| 122 | 106    | 10.5  | BBDuk       | Sailfish-ISR   |             | TPM      |
| 123 | 106    | 13    | Cutadapt    | STAR           | RSEM        | TPM      |
| 124 | 106    | 47    | BBDuk       | TopHat2        | HTSeq UNION | RLE      |
| 125 | 106    | 51    | Cutadapt    | TopHat2        | HTSeq UNION | RLE      |
| 126 | 106.25 | 3.75  | Trimmomatic | STAR           | eXpress     | TPM      |
| 127 | 106.25 | 16.25 | BBDuk       | Bowtie2        | eXpress     | FPKM     |
| 128 | 106.25 | 43.25 | BBDuk       | STAR           | HTSeq INTER | Raw      |
| 129 | 106.5  | 61.5  | Cutadapt    | HiSat2         | HTSeq INTER | Raw      |
| 130 | 106.75 | 44.25 | Trimmomatic | TopHat2        | HTSeq UNION | RLE      |

|     |        |       |             |                |             |            |
|-----|--------|-------|-------------|----------------|-------------|------------|
| 131 | 106.75 | 61.25 | Cutadapt    | HiSat2         | HTSeq UNION | Raw        |
| 132 | 107    | 0     | Cutadapt    | TopHat2        | Stringtie   | TPM        |
| 133 | 107.75 | 21.75 | Cutadapt    | TopHat2        | HTSeq INTER | TMM        |
| 134 | 107.75 | 27.75 | BBDuk       | STAR           | eXpress     | Eff_Counts |
| 135 | 107.75 | 42.75 | BBDuk       | STAR           | HTSeq UNION | Raw        |
| 136 | 108.25 | 31.25 | Trimmomatic | RUM            | Stringtie   | FPKM       |
| 137 | 108.25 | 43.25 | BBDuk       | HiSat2         | HTSeq UNION | Raw        |
| 138 | 108.5  | 6     | BBDuk       | Bowtie2        | RSEM        | TPM        |
| 139 | 108.5  | 11    | Trimmomatic | Salmon-FMD-ISR |             | TPM        |
| 140 | 108.75 | 63.25 | Cutadapt    | HiSat2         | Stringtie   | Coverage   |
| 141 | 109    | 6.5   | BBDuk       | Salmon-FMD-AUT |             | TPM        |
| 142 | 109    | 7.5   | Cutadapt    | STAR           | eXpress     | TPM        |
| 143 | 109.25 | 31.75 | Cutadapt    | TopHat2        | Stringtie   | FPKM       |
| 144 | 109.25 | 61.75 | Cutadapt    | RUM            | HTSeq UNION | Raw        |
| 145 | 109.5  | 7     | BBDuk       | Salmon-FMD-ISR |             | TPM        |
| 146 | 109.75 | 21.75 | BBDuk       | TopHat2        | Stringtie   | FPKM       |
| 147 | 110    | 11.5  | Trimmomatic | Salmon-QMB-AUT |             | TPM        |
| 148 | 110    | 47.5  | BBDuk       | TopHat2        | HTSeq INTER | Raw        |
| 149 | 110    | 49.5  | BBDuk       | Salmon-QMB-ISR |             | NumReads   |
| 150 | 110.25 | 49.25 | BBDuk       | Saifish-ISR    |             | NumReads   |
| 151 | 110.5  | 6.5   | Trimmomatic | Bowtie2        | eXpress     | TPM        |
| 152 | 110.5  | 46.5  | BBDuk       | TopHat2        | HTSeq UNION | Raw        |
| 153 | 110.5  | 48.5  | BBDuk       | Salmon-QMB-AUT |             | NumReads   |
| 154 | 110.5  | 52.5  | Cutadapt    | STAR           | eXpress     | Est_Count  |
| 155 | 110.75 | 19.25 | BBDuk       | STAR           | RSEM        | TPM        |
| 156 | 110.75 | 59.25 | Cutadapt    | RUM            | HTSeq INTER | Raw        |
| 157 | 111    | 7.5   | BBDuk       | STAR           | eXpress     | TPM        |
| 158 | 111    | 10.5  | Trimmomatic | Salmon-FMD-AUT |             | TPM        |
| 159 | 111.5  | 9     | Trimmomatic | Salmon-QMB-ISR |             | TPM        |
| 160 | 112.25 | 54.25 | Cutadapt    | Bowtie2        | eXpress     | Est_Count  |
| 161 | 112.5  | 6     | BBDuk       | Bowtie2        | eXpress     | TPM        |
| 162 | 112.75 | 45.25 | BBDuk       | Kallisto       |             | Est-Counts |
| 163 | 113    | 14    | Cutadapt    | Salmon-QMB-ISR |             | TPM        |
| 164 | 113.5  | 57.5  | Cutadapt    | TopHat2        | Stringtie   | Coverage   |
| 165 | 113.5  | 63.5  | Cutadapt    | STAR           | HTSeq UNION | Raw        |
| 166 | 113.75 | 61.75 | Cutadapt    | STAR           | Stringtie   | Coverage   |
| 167 | 114    | 25.5  | BBDuk       | STAR           | eXpress     | Est_Count  |
| 168 | 114    | 52.5  | Cutadapt    | STAR           | eXpress     | Eff_Counts |
| 169 | 114.25 | 42.25 | BBDuk       | Salmon-FMD-ISR |             | NumReads   |
| 170 | 114.25 | 62.75 | Cutadapt    | STAR           | HTSeq INTER | Raw        |
| 171 | 114.5  | 42.5  | BBDuk       | Salmon-FMD-AUT |             | NumReads   |
| 172 | 114.5  | 67    | Cutadapt    | Salmon-QMB-ISR |             | NumReads   |
| 173 | 114.75 | 10.75 | Trimmomatic | STAR           | RSEM        | TPM        |
| 174 | 114.75 | 55.25 | Cutadapt    | Bowtie2        | eXpress     | Eff_Counts |

|            |        |       |             |                |             |            |
|------------|--------|-------|-------------|----------------|-------------|------------|
| <b>175</b> | 115.25 | 14.25 | Cutadapt    | Salmon-QMB-AUT |             | TPM        |
| <b>176</b> | 115.25 | 66.25 | Cutadapt    | Salmon-QMB-AUT |             | NumReads   |
| <b>177</b> | 115.5  | 61    | Cutadapt    | TopHat2        | HTSeq INTER | Raw        |
| <b>178</b> | 115.5  | 61    | Cutadapt    | TopHat2        | HTSeq UNION | Raw        |
| <b>179</b> | 115.5  | 66    | Cutadapt    | Sailfish-ISR   |             | NumReads   |
| <b>180</b> | 116.75 | 16.25 | Cutadapt    | Sailfish-ISR   |             | TPM        |
| <b>181</b> | 117    | 9.5   | Cutadapt    | Salmon-FMD-ISR |             | TPM        |
| <b>182</b> | 117.5  | 16    | Cutadapt    | Bowtie2        | eXpress     | FPKM       |
| <b>183</b> | 117.75 | 63.25 | Cutadapt    | Salmon-FMD-ISR |             | NumReads   |
| <b>184</b> | 118    | 11    | Cutadapt    | Salmon-FMD-AUT |             | TPM        |
| <b>185</b> | 118.5  | 62.5  | Cutadapt    | Salmon-FMD-AUT |             | NumReads   |
| <b>186</b> | 118.75 | 59.75 | Cutadapt    | Kallisto       |             | Est-Counts |
| <b>187</b> | 119.25 | 30.25 | BBDuk       | Kallisto       |             | TPM        |
| <b>188</b> | 119.75 | 72.25 | Trimmomatic | Salmon-QMB-AUT |             | NumReads   |
| <b>189</b> | 120.25 | 25.25 | Trimmomatic | Kallisto       |             | TPM        |
| <b>190</b> | 125    | 25.5  | Cutadapt    | Kallisto       |             | TPM        |
| <b>191</b> | 129.5  | 11    | Trimmomatic | Sailfish-ISR   |             | TPM        |
| <b>192</b> | 133.25 | 21.75 | Cutadapt    | Bowtie2        | eXpress     | TPM        |

**Supplementary Table S6.** Overall ranking of the 192 pipelines based on the sum of the precision and accuracy in the two cell lines.

| <b>Overall RANK (precision and accuracy, cell lines A and B)</b> |                 |            |                        |                         |                        |                             |
|------------------------------------------------------------------|-----------------|------------|------------------------|-------------------------|------------------------|-----------------------------|
| <b>RANK position</b>                                             | <b>Sum RANK</b> | <b>MAD</b> | <b>Trimming method</b> | <b>Alignment method</b> | <b>Counting method</b> | <b>Normalization method</b> |
| 1                                                                | 249             | 8.5        | Trimmomatic            | RUM                     | HTSeq UNION            | TMM                         |
| 2                                                                | 252.5           | 8.75       | Trimmomatic            | RUM                     | HTSeq INTER            | TMM                         |
| 3                                                                | 253             | 13.25      | BBDuk                  | RUM                     | HTSeq UNION            | TMM                         |
| 4                                                                | 260             | 19.25      | BBDuk                  | STAR                    | HTSeq UNION            | TMM                         |
| 5                                                                | 260.5           | 15         | Cutadapt               | TopHat2                 | HTSeq UNION            | TMM                         |
| 6                                                                | 263             | 15.75      | BBDuk                  | TopHat2                 | HTSeq UNION            | TMM                         |
| 7                                                                | 265.5           | 16         | BBDuk                  | HiSat2                  | HTSeq UNION            | TMM                         |
| 8                                                                | 266             | 11         | BBDuk                  | TopHat2                 | HTSeq INTER            | TMM                         |
| 9                                                                | 267.5           | 8          | Trimmomatic            | STAR                    | HTSeq UNION            | TMM                         |
| 10                                                               | 269             | 4.5        | Trimmomatic            | STAR                    | HTSeq INTER            | TMM                         |
| 11                                                               | 270             | 11.5       | Trimmomatic            | HiSat2                  | HTSeq UNION            | TMM                         |
| 12                                                               | 270             | 13         | BBDuk                  | RUM                     | HTSeq INTER            | TMM                         |
| 13                                                               | 271.5           | 10.75      | Trimmomatic            | TopHat2                 | HTSeq UNION            | TMM                         |
| 14                                                               | 274.5           | 18.25      | Trimmomatic            | RUM                     | HTSeq UNION            | RLE                         |
| 15                                                               | 277             | 10.75      | Trimmomatic            | TopHat2                 | HTSeq INTER            | TMM                         |
| 16                                                               | 281.5           | 10.25      | Trimmomatic            | HiSat2                  | HTSeq INTER            | TMM                         |
| 17                                                               | 283.5           | 6          | Cutadapt               | RUM                     | HTSeq INTER            | TMM                         |
| 18                                                               | 286.5           | 23         | BBDuk                  | STAR                    | HTSeq INTER            | TMM                         |
| 19                                                               | 288.5           | 6          | Cutadapt               | RUM                     | HTSeq UNION            | TMM                         |
| 20                                                               | 293             | 2.5        | BBDuk                  | STAR                    | Stringtie              | TPM                         |
| 21                                                               | 293.5           | 16.75      | Trimmomatic            | RUM                     | HTSeq INTER            | RLE                         |
| 22                                                               | 295             | 12         | Cutadapt               | HiSat2                  | HTSeq INTER            | TMM                         |
| 23                                                               | 301             | 6          | BBDuk                  | HiSat2                  | HTSeq INTER            | TMM                         |
| 24                                                               | 301.5           | 5.5        | Cutadapt               | STAR                    | HTSeq UNION            | TMM                         |
| 25                                                               | 303.5           | 3.75       | Trimmomatic            | STAR                    | Stringtie              | FPKM                        |
| 26                                                               | 306             | 6          | BBDuk                  | STAR                    | Stringtie              | FPKM                        |
| 27                                                               | 306.5           | 9.5        | Cutadapt               | STAR                    | Cufflinks              | FPKM                        |
| 28                                                               | 309             | 19.25      | Cutadapt               | RUM                     | Cufflinks              | FPKM                        |
| 29                                                               | 310             | 2          | Cutadapt               | HiSat2                  | HTSeq UNION            | TMM                         |
| 30                                                               | 312             | 25.25      | Cutadapt               | Bowtie2                 | RSEM                   | TPM                         |
| 31                                                               | 313.5           | 5          | Cutadapt               | STAR                    | Stringtie              | FPKM                        |
| 32                                                               | 315             | 4.25       | Trimmomatic            | STAR                    | Cufflinks              | FPKM                        |
| 33                                                               | 316.5           | 21         | BBDuk                  | STAR                    | HTSeq UNION            | RLE                         |
| 34                                                               | 316.5           | 22.5       | Trimmomatic            | Bowtie2                 | RSEM                   | TPM                         |
| 35                                                               | 317             | 12.5       | Trimmomatic            | STAR                    | Stringtie              | TPM                         |
| 36                                                               | 318             | 26         | BBDuk                  | RUM                     | HTSeq UNION            | RLE                         |
| 37                                                               | 318.5           | 13.25      | BBDuk                  | HiSat2                  | HTSeq UNION            | RLE                         |
| 38                                                               | 319             | 19         | BBDuk                  | STAR                    | HTSeq INTER            | RLE                         |
| 39                                                               | 319.5           | 4.75       | Cutadapt               | STAR                    | HTSeq INTER            | TMM                         |



|    |       |       |             |                |             |      |
|----|-------|-------|-------------|----------------|-------------|------|
| 40 | 319.5 | 15.75 | Cutadapt    | STAR           | HTSeq INTER | RLE  |
| 41 | 319.5 | 23.25 | BBDuk       | Salmon-QMB-AUT |             | TPM  |
| 42 | 320   | 7.5   | BBDuk       | TopHat2        | HTSeq INTER | RLE  |
| 43 | 320   | 22.75 | BBDuk       | Sailfish-ISR   |             | TPM  |
| 44 | 320.5 | 8     | Cutadapt    | HiSat2         | HTSeq INTER | RLE  |
| 45 | 321   | 24.25 | Trimmomatic | Salmon-QMB-AUT |             | TPM  |
| 46 | 322   | 24.5  | BBDuk       | Salmon-QMB-ISR |             | TPM  |
| 47 | 322   | 27.75 | BBDuk       | Salmon-FMD-ISR |             | TPM  |
| 48 | 323   | 5.75  | Trimmomatic | TopHat2        | Cufflinks   | FPKM |
| 49 | 323   | 14.25 | BBDuk       | HiSat2         | HTSeq INTER | RLE  |
| 50 | 323   | 15.25 | Cutadapt    | STAR           | HTSeq UNION | RLE  |
| 51 | 323.5 | 17.5  | Cutadapt    | TopHat2        | HTSeq INTER | TMM  |
| 52 | 324   | 1.75  | Trimmomatic | HiSat2         | Cufflinks   | FPKM |
| 53 | 324   | 7.75  | BBDuk       | Bowtie2        | RSEM        | FPKM |
| 54 | 324.5 | 25    | BBDuk       | RUM            | HTSeq INTER | RLE  |
| 55 | 325   | 27.25 | BBDuk       | Salmon-FMD-AUT |             | TPM  |
| 56 | 325.5 | 3     | Cutadapt    | HiSat2         | HTSeq UNION | RLE  |
| 57 | 325.5 | 4.25  | Cutadapt    | HiSat2         | Cufflinks   | FPKM |
| 58 | 326   | 20.5  | Cutadapt    | STAR           | RSEM        | TPM  |
| 59 | 326   | 25    | Cutadapt    | Salmon-QMB-ISR |             | TPM  |
| 60 | 326.5 | 4.5   | Cutadapt    | STAR           | Stringtie   | TPM  |
| 61 | 327   | 22.75 | Trimmomatic | Salmon-FMD-ISR |             | TPM  |
| 62 | 327.5 | 26.5  | Cutadapt    | Salmon-QMB-AUT |             | TPM  |
| 63 | 328.5 | 2.75  | Cutadapt    | STAR           | RSEM        | FPKM |
| 64 | 328.5 | 3     | BBDuk       | HiSat2         | Cufflinks   | FPKM |
| 65 | 328.5 | 6.25  | Trimmomatic | Bowtie2        | RSEM        | FPKM |
| 66 | 328.5 | 8.5   | Trimmomatic | TopHat2        | HTSeq INTER | RLE  |
| 67 | 329   | 18.75 | Trimmomatic | RUM            | Cufflinks   | FPKM |
| 68 | 329   | 25.75 | Trimmomatic | Salmon-FMD-AUT |             | TPM  |
| 69 | 329.5 | 1     | Trimmomatic | STAR           | RSEM        | FPKM |
| 70 | 329.5 | 6     | Trimmomatic | STAR           | HTSeq INTER | RLE  |
| 71 | 329.5 | 7.5   | Cutadapt    | Bowtie2        | RSEM        | FPKM |
| 72 | 330   | 4     | Cutadapt    | TopHat2        | Cufflinks   | FPKM |
| 73 | 330   | 25.25 | Trimmomatic | Salmon-QMB-ISR |             | TPM  |
| 74 | 330   | 25.25 | BBDuk       | Bowtie2        | RSEM        | TPM  |
| 75 | 330.5 | 7.75  | BBDuk       | STAR           | Cufflinks   | FPKM |
| 76 | 332   | 29.75 | Cutadapt    | Salmon-FMD-ISR |             | TPM  |
| 77 | 333   | 5.5   | BBDuk       | TopHat2        | HTSeq UNION | RLE  |
| 78 | 333.5 | 9.75  | Cutadapt    | TopHat2        | HTSeq INTER | RLE  |
| 79 | 334   | 29    | Cutadapt    | Salmon-FMD-AUT |             | TPM  |
| 80 | 334.5 | 11    | Trimmomatic | HiSat2         | HTSeq INTER | RLE  |
| 81 | 335   | 7     | Trimmomatic | HiSat2         | HTSeq UNION | RLE  |
| 82 | 335.5 | 3     | BBDuk       | TopHat2        | Cufflinks   | FPKM |
| 83 | 336   | 5.5   | Cutadapt    | TopHat2        | HTSeq UNION | RLE  |
| 84 | 336.5 | 11    | Trimmomatic | STAR           | HTSeq UNION | RLE  |

|     |       |       |             |              |             |          |
|-----|-------|-------|-------------|--------------|-------------|----------|
| 85  | 337.5 | 28    | Trimmomatic | STAR         | RSEM        | TPM      |
| 86  | 338   | 4.25  | BBDuk       | STAR         | RSEM        | FPKM     |
| 87  | 338.5 | 7.5   | Trimmomatic | TopHat2      | HTSeq UNION | RLE      |
| 88  | 341   | 37.5  | BBDuk       | RUM          | Cufflinks   | FPKM     |
| 89  | 343.5 | 17.25 | BBDuk       | STAR         | RSEM        | TPM      |
| 90  | 346   | 59    | Trimmomatic | Sailfish-ISR |             | NumReads |
| 91  | 346.5 | 23.25 | Cutadapt    | Sailfish-ISR |             | TPM      |
| 92  | 351   | 21.5  | Cutadapt    | RUM          | HTSeq INTER | RLE      |
| 93  | 352.5 | 23.75 | Cutadapt    | RUM          | HTSeq UNION | RLE      |
| 94  | 354.5 | 20.5  | BBDuk       | Kallisto     |             | TPM      |
| 95  | 362   | 5.5   | Cutadapt    | RUM          | Stringtie   | TPM      |
| 96  | 362   | 14.5  | BBDuk       | TopHat2      | Stringtie   | TPM      |
| 97  | 363   | 23.25 | Cutadapt    | Kallisto     |             | TPM      |
| 98  | 363.5 | 9.5   | Trimmomatic | TopHat2      | Stringtie   | TPM      |
| 99  | 365   | 3.5   | Trimmomatic | TopHat2      | Stringtie   | FPKM     |
| 100 | 365.5 | 20    | Trimmomatic | Kallisto     |             | TPM      |
| 101 | 367   | 12    | Cutadapt    | TopHat2      | Stringtie   | TPM      |
| 102 | 367.5 | 3.5   | Cutadapt    | HiSat2       | Stringtie   | TPM      |
| 103 | 370.5 | 1.25  | Cutadapt    | TopHat2      | Stringtie   | FPKM     |
| 104 | 371.5 | 1.5   | BBDuk       | RUM          | Stringtie   | TPM      |
| 105 | 371.5 | 6     | BBDuk       | TopHat2      | Stringtie   | FPKM     |
| 106 | 372.5 | 3.25  | BBDuk       | HiSat2       | Stringtie   | FPKM     |
| 107 | 374.5 | 7.25  | Trimmomatic | HiSat2       | Stringtie   | FPKM     |
| 108 | 374.5 | 8.75  | BBDuk       | HiSat2       | Stringtie   | TPM      |
| 109 | 374.5 | 9.25  | BBDuk       | RUM          | Stringtie   | FPKM     |
| 110 | 378.5 | 14.5  | Cutadapt    | RUM          | Stringtie   | FPKM     |
| 111 | 380   | 6     | Cutadapt    | HiSat2       | Stringtie   | FPKM     |
| 112 | 385.5 | 4     | Trimmomatic | HiSat2       | Stringtie   | TPM      |
| 113 | 389   | 5     | Trimmomatic | RUM          | Stringtie   | TPM      |
| 114 | 389   | 32.25 | Trimmomatic | Sailfish-ISR |             | TPM      |
| 115 | 389.5 | 6     | Trimmomatic | RUM          | Stringtie   | FPKM     |
| 116 | 409.5 | 8.75  | Trimmomatic | STAR         | eXpress     | FPKM     |
| 117 | 416   | 3.5   | Cutadapt    | STAR         | eXpress     | FPKM     |
| 118 | 423   | 7.5   | Cutadapt    | STAR         | eXpress     | TPM      |
| 119 | 425.5 | 2     | BBDuk       | STAR         | eXpress     | FPKM     |
| 120 | 431.5 | 0.5   | Trimmomatic | STAR         | eXpress     | TPM      |
| 121 | 436   | 11.25 | Trimmomatic | Bowtie2      | eXpress     | FPKM     |
| 122 | 445.5 | 18.25 | Trimmomatic | RUM          | Stringtie   | Coverage |
| 123 | 448   | 4.25  | BBDuk       | STAR         | eXpress     | TPM      |
| 124 | 449.5 | 4.5   | BBDuk       | Bowtie2      | eXpress     | FPKM     |
| 125 | 452   | 12.75 | Trimmomatic | HiSat2       | HTSeq INTER | Raw      |
| 126 | 455.5 | 13.5  | Trimmomatic | HiSat2       | HTSeq UNION | Raw      |
| 127 | 456   | 15.25 | BBDuk       | RUM          | Stringtie   | Coverage |
| 128 | 459   | 4     | Trimmomatic | Bowtie2      | eXpress     | TPM      |
| 129 | 462   | 3.5   | BBDuk       | Bowtie2      | eXpress     | TPM      |

|     |       |       |             |                |             |            |
|-----|-------|-------|-------------|----------------|-------------|------------|
| 130 | 462   | 10.75 | Cutadapt    | Bowtie2        | eXpress     | FPKM       |
| 131 | 467   | 15.75 | Trimmomatic | RUM            | HTSeq INTER | Raw        |
| 132 | 471.5 | 14.25 | Trimmomatic | HiSat2         | Stringtie   | Coverage   |
| 133 | 472   | 16.5  | BBDuk       | Bowtie2        | eXpress     | Eff_Counts |
| 134 | 472.5 | 15    | Trimmomatic | RUM            | HTSeq UNION | Raw        |
| 135 | 474   | 17.5  | Trimmomatic | TopHat2        | Stringtie   | Coverage   |
| 136 | 481   | 14.25 | Trimmomatic | STAR           | eXpress     | Eff_Counts |
| 137 | 482   | 12    | BBDuk       | RUM            | HTSeq INTER | Raw        |
| 138 | 485   | 12.5  | BBDuk       | Bowtie2        | eXpress     | Est_Count  |
| 139 | 486.5 | 22.5  | Trimmomatic | Bowtie2        | eXpress     | Eff_Counts |
| 140 | 488   | 2.5   | BBDuk       | TopHat2        | Stringtie   | Coverage   |
| 141 | 488.5 | 3     | BBDuk       | HiSat2         | Stringtie   | Coverage   |
| 142 | 489   | 11.25 | Trimmomatic | Salmon-FMD-ISR |             | NumReads   |
| 143 | 489   | 13.25 | Trimmomatic | STAR           | eXpress     | Est_Count  |
| 144 | 491.5 | 11    | Trimmomatic | Salmon-FMD-AUT |             | NumReads   |
| 145 | 492.5 | 12    | BBDuk       | RUM            | HTSeq UNION | Raw        |
| 146 | 493   | 16.5  | Trimmomatic | Kallisto       |             | Est-Counts |
| 147 | 494.5 | 6     | Cutadapt    | Bowtie2        | eXpress     | TPM        |
| 148 | 495.5 | 6     | BBDuk       | STAR           | eXpress     | Eff_Counts |
| 149 | 496.5 | 6.5   | BBDuk       | HiSat2         | HTSeq INTER | Raw        |
| 150 | 497.5 | 2.5   | BBDuk       | STAR           | Stringtie   | Coverage   |
| 151 | 497.5 | 11.25 | Trimmomatic | Salmon-QMB-ISR |             | NumReads   |
| 152 | 501   | 14    | Trimmomatic | STAR           | HTSeq INTER | Raw        |
| 153 | 501.5 | 16.5  | Trimmomatic | STAR           | Stringtie   | Coverage   |
| 154 | 502   | 12.25 | Trimmomatic | TopHat2        | HTSeq INTER | Raw        |
| 155 | 503.5 | 7.75  | BBDuk       | HiSat2         | HTSeq UNION | Raw        |
| 156 | 504   | 12.5  | Trimmomatic | TopHat2        | HTSeq UNION | Raw        |
| 157 | 504   | 13.75 | Trimmomatic | STAR           | HTSeq UNION | Raw        |
| 158 | 504.5 | 4     | BBDuk       | STAR           | HTSeq INTER | Raw        |
| 159 | 510.5 | 5.5   | BBDuk       | STAR           | HTSeq UNION | Raw        |
| 160 | 511   | 5.5   | BBDuk       | STAR           | eXpress     | Est_Count  |
| 161 | 513   | 7.75  | BBDuk       | TopHat2        | HTSeq INTER | Raw        |
| 162 | 513   | 9     | BBDuk       | Salmon-QMB-AUT |             | NumReads   |
| 163 | 513.5 | 8.25  | BBDuk       | Sailfish-ISR   |             | NumReads   |
| 164 | 514   | 8.25  | BBDuk       | Salmon-QMB-ISR |             | NumReads   |
| 165 | 514.5 | 11.75 | BBDuk       | Salmon-FMD-ISR |             | NumReads   |
| 166 | 515   | 8.5   | BBDuk       | TopHat2        | HTSeq UNION | Raw        |
| 167 | 515   | 12.5  | BBDuk       | Salmon-FMD-AUT |             | NumReads   |
| 168 | 515.5 | 8     | BBDuk       | Kallisto       |             | Est-Counts |
| 169 | 516.5 | 23    | Trimmomatic | Bowtie2        | eXpress     | Est_Count  |
| 170 | 534   | 4.5   | Cutadapt    | STAR           | eXpress     | Est_Count  |
| 171 | 538   | 6.5   | Cutadapt    | HiSat2         | HTSeq INTER | Raw        |
| 172 | 539.5 | 7     | Cutadapt    | HiSat2         | HTSeq UNION | Raw        |
| 173 | 540.5 | 5     | Cutadapt    | RUM            | Stringtie   | Coverage   |
| 174 | 552.5 | 2.5   | Cutadapt    | HiSat2         | Stringtie   | Coverage   |

|            |       |       |             |                |             |            |
|------------|-------|-------|-------------|----------------|-------------|------------|
| <b>175</b> | 553.5 | 1.25  | Cutadapt    | Bowtie2        | eXpress     | Est_Count  |
| <b>176</b> | 554   | 11.75 | Cutadapt    | Salmon-QMB-ISR |             | NumReads   |
| <b>177</b> | 555   | 11.25 | Cutadapt    | Sailfish-ISR   |             | NumReads   |
| <b>178</b> | 555.5 | 11.75 | Cutadapt    | Salmon-QMB-AUT |             | NumReads   |
| <b>179</b> | 556   | 7     | Cutadapt    | STAR           | eXpress     | Eff_Counts |
| <b>180</b> | 556.5 | 9.75  | Cutadapt    | Kallisto       |             | Est-Counts |
| <b>181</b> | 556.5 | 14    | Cutadapt    | Salmon-FMD-ISR |             | NumReads   |
| <b>182</b> | 557   | 14.5  | Cutadapt    | Salmon-FMD-AUT |             | NumReads   |
| <b>183</b> | 560.5 | 0.5   | Cutadapt    | RUM            | HTSeq INTER | Raw        |
| <b>184</b> | 560.5 | 1     | Cutadapt    | RUM            | HTSeq UNION | Raw        |
| <b>185</b> | 562   | 3     | Cutadapt    | TopHat2        | Stringtie   | Coverage   |
| <b>186</b> | 566.5 | 3.75  | Cutadapt    | STAR           | Stringtie   | Coverage   |
| <b>187</b> | 568.5 | 3.5   | Cutadapt    | Bowtie2        | eXpress     | Eff_Counts |
| <b>188</b> | 572   | 5.25  | Cutadapt    | TopHat2        | HTSeq INTER | Raw        |
| <b>189</b> | 573   | 2.5   | Cutadapt    | STAR           | HTSeq UNION | Raw        |
| <b>190</b> | 573.5 | 2.5   | Cutadapt    | STAR           | HTSeq INTER | Raw        |
| <b>191</b> | 578   | 4.5   | Cutadapt    | TopHat2        | HTSeq UNION | Raw        |
| <b>192</b> | 593.5 | 13.5  | Trimmomatic | Salmon-QMB-AUT |             | NumReads   |

**Supplementary Table S7.** Results of the trimming algorithms. Percentage of surviving reads and alignment rate for each of the analysed samples.

| Sample*               | Percentage of surviving reads |             |             | Alignment rate (%)** |                   |                   |
|-----------------------|-------------------------------|-------------|-------------|----------------------|-------------------|-------------------|
|                       | Trimmomatic                   | Cutadapt    | BBDuk       | Trimmomatic          | Cutadapt          | BBDuk             |
| CLA-T0-S1             | 83.5                          | 95.9        | 92.7        | 94,9 ± 0,4           | 90,5 ± 3,1        | 97,0 ± 1,2        |
| CLA-T0-S 2            | 84.4                          | 95.0        | 88.8        | 96,9 ± 0,8           | 95,0 ± 1,9        | 98,0 ± 0,7        |
| CLA-T0-S3             | 84.2                          | 95.4        | 89.6        | 96,8 ± 1,6           | 94,0 ± 2,1        | 97,9 ± 1,1        |
| CLB-T0-S1             | 88.9                          | 96.8        | 93.9        | 96,1 ± 0,5           | 94,0 ± 2,4        | 97,6 ± 0,8        |
| CLB-T0-S2             | 79.4                          | 94.5        | 85.6        | 95,8 ± 1,2           | 93,8 ± 2,5        | 97,3 ± 1,4        |
| CLB-T0-S3             | 83.2                          | 95.6        | 89.9        | 96,0 ± 1,1           | 93,1 ± 2,6        | 97,8 ± 0,8        |
| <b>Median CLA</b>     | <b>84.2</b>                   | <b>95.4</b> | <b>89.6</b> | <b>96,1 ± 1,4</b>    | <b>93,1 ± 2,6</b> | <b>97,4 ± 1,3</b> |
| <b>Median CLB</b>     | <b>83.2</b>                   | <b>95.6</b> | <b>89.9</b> | <b>96,0 ± 1,0</b>    | <b>93,8 ± 2,5</b> | <b>97,6 ± 1,0</b> |
| <b>Overall median</b> | <b>83.8</b>                   | <b>95.5</b> | <b>89.8</b> | <b>96,1 ± 1,2</b>    | <b>93,4 ± 2,5</b> | <b>97,5 ± 1,2</b> |

\*CLA = Cell line A (KMS12-BM); CLB = Cell line B (JJN-3); T0 = DMSO

\*\* Values are represented as median ± median absolute deviation (MAD)

**Supplementary Table S8.** Kruskal-Wallis and Dunn's test results for raw gene expression quantification based on the trimming algorithms.

| <b>Contrast</b> | <b>Chi squared statistic</b> | <b>Degrees of freedom</b> | <b><i>p</i>-value</b> | <b>Pairwise contrast</b> | <b>Dunn's pairwise z test statistic</b> | <b>Dunn's test FDR</b> |
|-----------------|------------------------------|---------------------------|-----------------------|--------------------------|-----------------------------------------|------------------------|
| Kruskal-Wallis  | 3.07E+00                     | 2                         | 2.20E-01              | Trimmomatic vs. Cutadapt | 1.59E+00                                | 1.69E-01               |
|                 |                              |                           |                       | Trimmomatic vs. BBDuk    | 1.50E-01                                | 4.40E-01               |
|                 |                              |                           |                       | Cutadapt vs. BBDuk       | -1.44E+00                               | 1.13E-01               |

**Supplementary Table S9.** Kruskal-Wallis and Dunn's test results for raw gene expression quantification based on the alignment algorithms.

| <b>Contrast</b>  | <b>Chi squared statistic</b> | <b>Degrees of freedom</b> | <b><i>p</i>-value</b> | <b>Pairwise contrast</b> | <b>Dunn's pairwise z test statistic</b> | <b>Dunn's test FDR</b> |
|------------------|------------------------------|---------------------------|-----------------------|--------------------------|-----------------------------------------|------------------------|
| Kruskal-Wallis   | 3.85E+00                     | 4                         | 4.30E-01              | Bowtie2 vs. HiSat2       | 1.63E+00                                | 2.60E-01               |
|                  |                              |                           |                       | Bowtie2 vs. RUM          | 1.87E+00                                | 3.10E-01               |
|                  |                              |                           |                       | HiSat2 vs. RUM           | 2.77E-01                                | 4.89E-01               |
|                  |                              |                           |                       | Bowtie2 vs. STAR         | 1.52E+00                                | 2.14E-01               |
|                  |                              |                           |                       | HiSat2 vs. STAR          | -2.76E-01                               | 4.35E-01               |
|                  |                              |                           |                       | RUM vs. STAR             | -5.83E-01                               | 4.66E-01               |
|                  |                              |                           |                       | Bowtie2 vs. Tophat2      | 1.31E+00                                | 2.38E-01               |
|                  |                              |                           |                       | HiSat2 vs. Tophat2       | -3.66E-01                               | 5.10E-01               |
|                  |                              |                           |                       | RUM vs. Tophat2          | -6.43E-01                               | 5.20E-01               |
| STAR vs. Tophat2 | -1.30E-01                    | 4.48E-01                  |                       |                          |                                         |                        |

**Supplementary Table S10.** Kruskal-Wallis and Dunn's test results for raw gene expression quantification based on the counting method.

| Contrast           | Chi squared statistic | Degrees of freedom | <i>p</i> -value* | Pairwise contrast           | Dunn's pairwise z test statistic | Dunn's test FDR* |
|--------------------|-----------------------|--------------------|------------------|-----------------------------|----------------------------------|------------------|
| Kruskal-Wallis     | 3.38E+01              | 5                  | < 0.01           | Cufflinks vs. eXpress       | -4.22E+00                        | 6.15E-05         |
|                    |                       |                    |                  | Cufflinks vs. HTSeq INTER   | -1.08E+00                        | 2.11E-01         |
|                    |                       |                    |                  | eXpress vs. HTSeq INTER     | 4.30E+00                         | 6.47E-05         |
|                    |                       |                    |                  | Cufflinks vs. HTSeq UNION   | -1.02E+00                        | 2.09E-01         |
|                    |                       |                    |                  | eXpress vs. HTSeq UNION     | 4.36E+00                         | 9.56E-05         |
|                    |                       |                    |                  | HTSeq INTER vs. HTSeq UNION | 7.43E-02                         | 4.70E-01         |
|                    |                       |                    |                  | Cufflinks vs. RSEM          | -2.91E-01                        | 4.13E-01         |
|                    |                       |                    |                  | eXpress vs. RSEM            | 3.88E+00                         | 1.94E-04         |
|                    |                       |                    |                  | HTSeq INTER vs. RSEM        | 7.19E-01                         | 2.95E-01         |
|                    |                       |                    |                  | HTSeq UNION vs. RSEM        | 6.67E-01                         | 2.91E-01         |
|                    |                       |                    |                  | Cufflinks vs. Stringtie     | -2.69E+00                        | 1.08E-02         |
|                    |                       |                    |                  | eXpress vs. Stringtie       | 2.26E+00                         | 1.99E-02         |
|                    |                       |                    |                  | HTSeq INTER vs. Stringtie   | -2.28E+00                        | 2.13E-02         |
|                    |                       |                    |                  | HTSeq UNION vs. Stringtie   | -2.35E+00                        | 2.33E-02         |
| RSEM vs. Stringtie | -2.33E+00             | 2.12E-02           |                  |                             |                                  |                  |

\* Statistically significant comparisons (< 0.05) are shown in green



**Supplementary Table S11.** Kruskal-Wallis and Dunn's test results for raw gene expression quantification based on the normalization approaches.

| Contrast          | Chi squared statistic | Degrees of freedom | p-value* | Pairwise contrast        | Dunn's pairwise z test statistic | Dunn's test FDR* |
|-------------------|-----------------------|--------------------|----------|--------------------------|----------------------------------|------------------|
| Kruskal-Wallis    | 1.51E+02              | 8                  | < 0.01   | Coverage vs. Eff_Counts  | -7.65E-02                        | 4.97E-01         |
|                   |                       |                    |          | Coverage vs. Est_Count   | -3.86E-01                        | 4.50E-01         |
|                   |                       |                    |          | Eff_Counts vs. Est_Count | -2.50E-01                        | 4.81E-01         |
|                   |                       |                    |          | Coverage vs. FPKM        | 3.87E+00                         | 1.09E-04         |
|                   |                       |                    |          | Eff_Counts vs. FPKM      | 3.01E+00                         | 2.23E-03         |
|                   |                       |                    |          | Est_Count vs. FPKM       | 3.92E+00                         | 1.01E-04         |
|                   |                       |                    |          | Coverage vs. NumReads    | -4.94E-01                        | 4.30E-01         |
|                   |                       |                    |          | Eff_Counts vs. NumReads  | -3.17E-01                        | 4.66E-01         |
|                   |                       |                    |          | Est_Count vs. NumReads   | -4.98E-02                        | 4.80E-01         |
|                   |                       |                    |          | FPKM vs. NumReads        | -4.82E+00                        | 2.36E-06         |
|                   |                       |                    |          | Coverage vs. Raw         | -4.18E-01                        | 4.51E-01         |
|                   |                       |                    |          | Eff_Counts vs. Raw       | -2.40E-01                        | 4.71E-01         |
|                   |                       |                    |          | Est_Count vs. Raw        | 5.76E-02                         | 4.91E-01         |
|                   |                       |                    |          | FPKM vs. Raw             | -5.45E+00                        | 9.82E-08         |
|                   |                       |                    |          | NumReads vs. Raw         | 1.32E-01                         | 4.88E-01         |
|                   |                       |                    |          | Coverage vs. RLE         | 4.74E+00                         | 3.27E-06         |
|                   |                       |                    |          | Eff_Counts vs. RLE       | 3.75E+00                         | 1.58E-04         |
|                   |                       |                    |          | Est_Count vs. RLE        | 4.72E+00                         | 3.28E-06         |
|                   |                       |                    |          | FPKM vs. RLE             | 1.46E+00                         | 1.04E-01         |
|                   |                       |                    |          | NumReads vs. RLE         | 5.67E+00                         | 4.33E-08         |
|                   |                       |                    |          | Raw vs. RLE              | 6.31E+00                         | 9.93E-10         |
|                   |                       |                    |          | Coverage vs. TMM         | 6.94E+00                         | 2.36E-11         |
|                   |                       |                    |          | Eff_Counts vs. TMM       | 5.46E+00                         | 1.08E-07         |
|                   |                       |                    |          | Est_Count vs. TMM        | 6.71E+00                         | 8.62E-11         |
|                   |                       |                    |          | FPKM vs. TMM             | 4.42E+00                         | 1.21E-05         |
|                   |                       |                    |          | NumReads vs. TMM         | 8.03E+00                         | 8.43E-15         |
|                   |                       |                    |          | Raw vs. TMM              | 9.01E+00                         | 3.69E-18         |
|                   |                       |                    |          | RLE vs. TMM              | 2.70E+00                         | 5.45E-03         |
|                   |                       |                    |          | Coverage vs. TPM         | 3.84E+00                         | 1.14E-04         |
|                   |                       |                    |          | Eff_Counts vs. TPM       | 2.97E+00                         | 2.43E-03         |
| Est_Count vs. TPM | 3.89E+00              | 1.06E-04           |          |                          |                                  |                  |
| FPKM vs. TPM      | -1.37E-01             | 5.01E-01           |          |                          |                                  |                  |
| NumReads vs. TPM  | 4.82E+00              | 2.59E-06           |          |                          |                                  |                  |
| Raw vs. TPM       | 5.50E+00              | 1.00E-07           |          |                          |                                  |                  |
| RLE vs. TPM       | -1.63E+00             | 7.81E-02           |          |                          |                                  |                  |
| TMM vs. TPM       | -4.67E+00             | 3.88E-06           |          |                          |                                  |                  |

\* Statistically significant comparisons (p-value or FDR < 0.05) are shown in green

**Supplementary Table S12.** Kruskal-Wallis and Dunn's test results for raw gene expression quantification based on the pseudoalignment algorithms.

| <b>Contrast</b> | <b>Chi squared statistic</b> | <b>Degrees of freedom</b> | <b><i>p</i>-value</b> | <b>Pairwise contrast</b> | <b>Dunn's pairwise z test statistic</b> | <b>Dunn's test FDR</b> |
|-----------------|------------------------------|---------------------------|-----------------------|--------------------------|-----------------------------------------|------------------------|
| Kruskal-Wallis  | 1.08E+00                     | 2                         | 5.80E-01              | Kallisto vs. Sailfish    | 8.08E-01                                | 3.14E-01               |
|                 |                              |                           |                       | Kallisto vs. Salmon      | 1.02E+00                                | 4.63E-01               |
|                 |                              |                           |                       | Sailfish vs. Salmon      | -4.33E-03                               | 4.98E-01               |

**Supplementary Table S13.** Kruskal-Wallis and Dunn's results for the pipelines based on pseudoaligner and classic aligner data.

| Contrast             | Chi squared statistic | Degrees of freedom | p-value  | Pairwise contrast     | Dunn's pairwise z test statistic | Dunn's test FDR |
|----------------------|-----------------------|--------------------|----------|-----------------------|----------------------------------|-----------------|
| Kruskal-Wallis       | 9.51E+00              | 7                  | 2.20E-01 | Bowtie2 vs. HiSat2    | 1.58E+00                         | 2.00E-01        |
|                      |                       |                    |          | Bowtie2 vs. Kallisto  | -6.64E-01                        | 3.94E-01        |
|                      |                       |                    |          | HiSat2 vs. Kallisto   | -1.75E+00                        | 2.79E-01        |
|                      |                       |                    |          | Bowtie2 vs. RUM       | 1.76E+00                         | 3.63E-01        |
|                      |                       |                    |          | HiSat2 vs. RUM        | 2.14E-01                         | 4.65E-01        |
|                      |                       |                    |          | Kallisto vs. RUM      | 1.88E+00                         | 4.25E-01        |
|                      |                       |                    |          | Bowtie2 vs. Sailfish  | 2.65E-02                         | 5.08E-01        |
|                      |                       |                    |          | HiSat2 vs. Sailfish   | -1.02E+00                        | 3.06E-01        |
|                      |                       |                    |          | Kallisto vs. Sailfish | 5.64E-01                         | 4.01E-01        |
|                      |                       |                    |          | RUM vs. Sailfish      | -1.15E+00                        | 2.70E-01        |
|                      |                       |                    |          | Bowtie2 vs. Salmon    | 2.93E-02                         | 5.26E-01        |
|                      |                       |                    |          | HiSat2 vs. Salmon     | -1.68E+00                        | 2.58E-01        |
|                      |                       |                    |          | Kallisto vs. Salmon   | 7.06E-01                         | 3.96E-01        |
|                      |                       |                    |          | RUM vs. Salmon        | -1.89E+00                        | 8.30E-01        |
|                      |                       |                    |          | Sailfish vs. Salmon   | -7.39E-03                        | 4.97E-01        |
|                      |                       |                    |          | Bowtie2 vs. STAR      | 1.50E+00                         | 2.09E-01        |
|                      |                       |                    |          | HiSat2 vs. STAR       | -2.44E-01                        | 4.71E-01        |
|                      |                       |                    |          | Kallisto vs. STAR     | 1.68E+00                         | 2.18E-01        |
|                      |                       |                    |          | RUM vs. STAR          | -4.81E-01                        | 4.20E-01        |
|                      |                       |                    |          | Sailfish vs. STAR     | 9.26E-01                         | 3.31E-01        |
|                      |                       |                    |          | Salmon vs. STAR       | 1.62E+00                         | 2.11E-01        |
|                      |                       |                    |          | Bowtie2 vs. Tophat2   | 1.19E+00                         | 2.71E-01        |
|                      |                       |                    |          | HiSat2 vs. Tophat2    | -4.44E-01                        | 4.18E-01        |
|                      |                       |                    |          | Kallisto vs. Tophat2  | 1.50E+00                         | 1.89E-01        |
| RUM vs. Tophat2      | -6.57E-01             | 3.76E-01           |          |                       |                                  |                 |
| Sailfish vs. Tophat2 | 7.68E-01              | 3.87E-01           |          |                       |                                  |                 |
| Salmon vs. Tophat2   | 1.27E+00              | 2.61E-01           |          |                       |                                  |                 |
| STAR vs. Tophat2     | -2.48E-01             | 4.89E-01           |          |                       |                                  |                 |
